# Supplementary material for: Optimizing dirhodium(ii) tetrakiscarboxylates as chiral NMR auxiliaries
Source: Royal Society of Chemistry journal article supplement (doi:10.1039/c1ob05665d), 2011-01-01

## Supplementary Information

### Optimizing dirhodium(II) tetrakis(carboxylates) as chiral NMR auxiliaries

Jens T. Mattiza<sup>a</sup>, Joerg G. G. Fohrer<sup>a</sup>, Helmut Duddeck<sup>a,\*</sup>, Michael G. Gardiner<sup>b</sup>  
and Ashraf Ghanem<sup>c</sup>

**Scheme 3** Structures of the dirhodium tetracarboxylate complexes and the ligands investigated.

**Experimental** Complete spectral data sets of the dirhodium complexes (for their structures see Scheme 1).

**Table S1** Spectral data of the ligands.

**Tables S2a – S2e** NMR spectral data of the dirhodium complex – ligand adducts (for their structures see Scheme 1).

**Table S3** X-ray data and ORTEP plot of the bis(methanol) adduct of **N2tL**.

**NMR Spectra** Eleven <sup>1</sup>H and eleven <sup>13</sup>C NMR spectra of 1:1-adducts and ligands.

**Scheme 3** Structures of the dirhodium tetracarboxylate complexes and the ligands investigated.

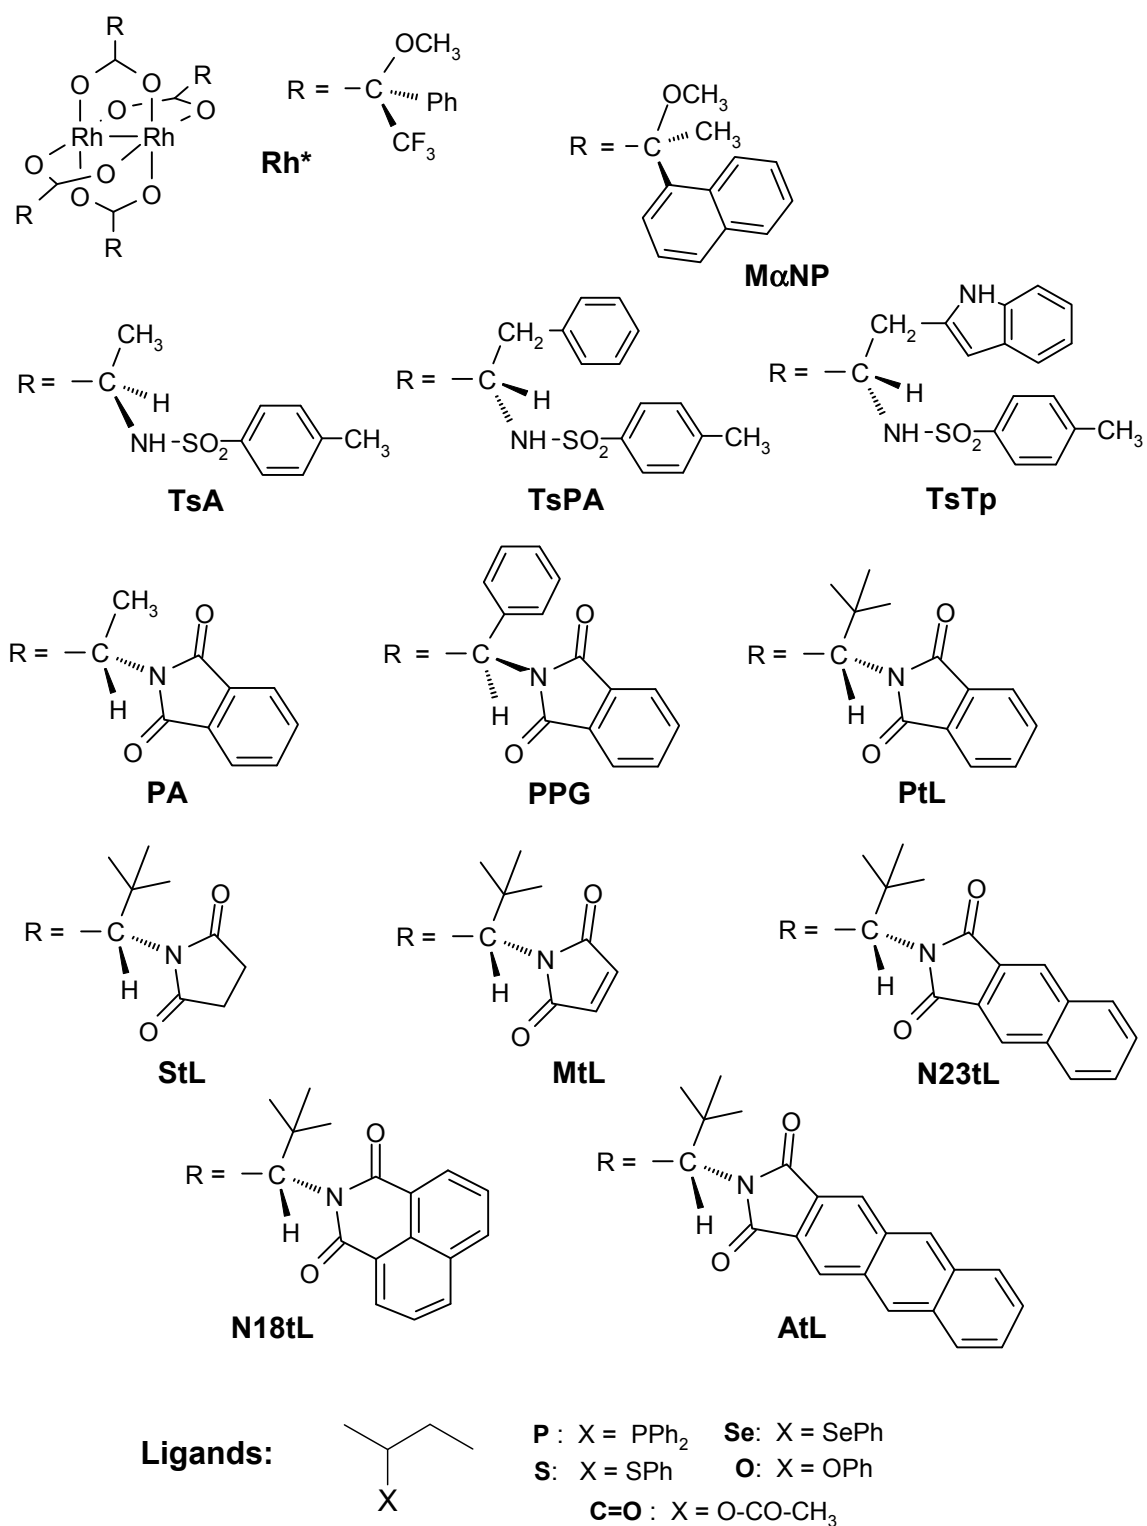

## Experimental

For details on NMR measurements see original manuscript. IR spectra were recorded on a Bruker Vector 22 spectrometer without solvent. Specific rotations  $[\alpha]_D^{20}$  at 589 nm were measured in methanol or chloroform at room temperature; concentrations (in g/ml) are given in parentheses. Mass spectrometry of the dirhodium complexes using a Micromass LCT (ESI mode) was not successful. Complete spectral data sets are given in the following for those dirhodium complexes unreported hitherto (see structures in Scheme 3):

### Dirhodium(II) tetrakis[*N-p*-toluenesulfonyl-(*R*)-alaninate] (TsA)

Yield: 35 %.  $^1\text{H}$  NMR recorded in  $\text{CDCl}_3$  (ppm):  $\delta = 1.27$  (d, 12H, H-3,  $^3J_{\text{HH}} = 7.3$  Hz); 2.36 (s, 12H, H-8); 3.71 (q, 4H, H-2,  $^3J_{\text{HH}} = 7.3$  Hz); 7.34 (dd, 8H, H-6/6'), 7.73 (m, 8H, H-5/5').  $^{13}\text{C}$  NMR recorded in  $\text{CDCl}_3$  (ppm):  $\delta = 20.2$  ( $\text{CH}_3$ , C-3); 21.5 ( $\text{CH}_3$ , C-8); 53.7 (CH, C-

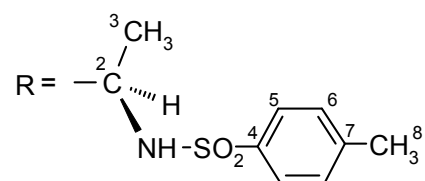

2); 128.3 (CH, C-5/5'); 130.7 (CH, C-6/6'); 139.3 (C, C-4); 143.7 (C, C-7); 192.8 ( $\text{CO}_2$ , C-1). IR (solid,  $\text{cm}^{-1}$ ):  $\tilde{\nu} = 3035, 2978, 1741, 1705, 1621, 1378, 1154, 1075, 717, 696$ .  $[\alpha]_D^{20} = -16.7$  (MeOH,  $c = 0.004$ ).

### Dirhodium(II) tetrakis[*N-p*-toluenesulfonyl-(*S*)-phenylalaninate] (TsPA)

Yield: 51 %.  $^1\text{H}$  NMR recorded in  $\text{CDCl}_3$  (ppm):  $\delta = 2.32$  (s, 12H, H-12); 2.70 (ddd, 8H, H-3,  $^2J_{\text{HH}} = 14.2$  Hz,  $^3J_{\text{HH}} = 9.3$  Hz,  $^3J_{\text{HH}} = 4.5$  Hz); 3.73 (dd, 4H, H-2,  $^3J_{\text{HH}} = 9.3$  Hz,  $^3J_{\text{HH}} = 4.5$  Hz); 6.98 (m, 8H, H-10/10'), 7.09 (m, 20H, H-5/5'/6/6'/7); 7.26 (m, 8H, H-9/9').  $^{13}\text{C}$  NMR recorded in  $\text{CDCl}_3$  (ppm):  $\delta = 21.6$  ( $\text{CH}_3$ , C-12); 40.4

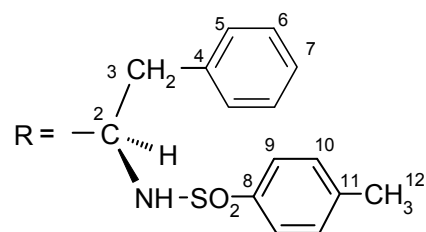

( $\text{CH}_2$ , C-3); 59.7 (CH, C-2); 127.5 (CH, C-7); 127.8 (CH, C-9/9'); 129.3 (CH, C-5/5'); 130.5 (CH, C-6/6'); 130.6 (CH, C-10/10'); 138.6 (C, C-8); 139.3 (C, C-4); 144.2 (C, C-11); 191.8 ( $\text{CO}_2$ , C-1). IR (solid,  $\text{cm}^{-1}$ ):  $\tilde{\nu} = 3050, 2925, 2362, 2348, 1585, 1403, 1324, 1155, 1091, 812, 699, 665$ .  $[\alpha]_D^{20} = -44.61$  (MeOH,  $c = 0.0023$ ).

### Dirhodium(II) tetrakis[3-(*N-p*-toluenesulfonyl)-(S)-tryptophanate] (TsTp)

Yield: 24 %.  $^1\text{H}$  NMR recorded in  $\text{CDCl}_3$  (ppm):  $\delta = 2.27$  (s, 12H, H-16); 3.10 (ddd, 8H, H-3,  $^2J_{\text{HH}} = 14.6$  Hz,  $^3J_{\text{HH}} = 8.2$  Hz,  $^3J_{\text{HH}} = 4.4$  Hz); 3.88 (dd, 4H, H-2,  $^3J_{\text{HH}} = 8.2$  Hz,  $^3J_{\text{HH}} = 4.4$  Hz); 6.89 (m, 4H, H-9); 6.96 (dd, 8H, H-14/14'); 6.98 (s, 4H, H-5); 7.03 (m, 4H, H-8), 7.24 (m, 4H, H-7); 7.34 (dd, 8H, H-13/13'), 7.44 (m, 4H, H-

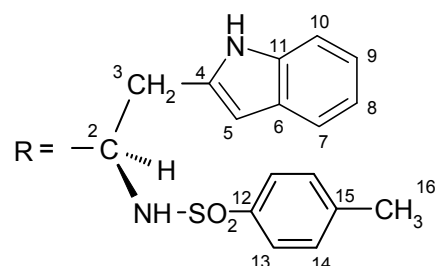

10).  $^{13}\text{C}$  NMR recorded in  $\text{CDCl}_3$  (ppm):  $\delta = 21.6$  ( $\text{CH}_3$ , C-16); 30.3 ( $\text{CH}_2$ , C-3); 59.8 ( $\text{CH}$ , C-2); 111.5 (C, C-4); 112.2 ( $\text{CH}$ , C-7); 119.6 ( $\text{CH}$ , C-9); 119.7 ( $\text{CH}$ , C-10); 122.1 ( $\text{CH}$ , C-8); 124.8 ( $\text{CH}$ , C-5); 127.8 ( $\text{CH}$ , C-13/13'); 128.9 ( $\text{CH}$ , C-11); 130.2 (C, C-14/14'); 138.0 (C, C-6); 138.5 (C, C-12); 144.1 (C, C-15); 188.7 ( $\text{CO}_2$ , C-1). IR (solid,  $\text{cm}^{-1}$ ):  $\tilde{\nu} = 3054, 2915, 2358, 2343, 1601, 1399, 1322, 1153, 1090, 812, 741, 664$ .  $[\alpha]_{\text{D}}^{20} = -95.6$  ( $\text{CHCl}_3$ ,  $c = 0.0046$ ).

#### Dirhodium(II) tetrakis[*N*-phthaloyl-(*S*)-alaninate] (PA)

Yield: 59 %.  $^1\text{H}$  NMR recorded in  $\text{CDCl}_3$  (ppm):  $\delta = 1.54$  (s, 12H, H-3,  $^3J_{\text{HH}} = 7.2$  Hz); 5.09 (q, 4H, H-2,  $^3J_{\text{HH}} = 7.2$  Hz); 7.62 (m, 8H, H-7/7'); 7.77 (m, 8H, H-6/6').  $^{13}\text{C}$  NMR recorded in  $\text{CDCl}_3$  (ppm):  $\delta = 15.9$  ( $\text{CH}_3$ , C-3); 48.6 ( $\text{CH}$ , C-2); 123.3 ( $\text{CH}$ , C-6/6'); 131.9 ( $\text{CH}$ , C-7/7'); 133.7 (C, C-5/5'); 167.2 (C=O, C-4/4'); 188.5 ( $\text{CO}_2$ , C-1). IR (solid,  $\text{cm}^{-1}$ ):  $\tilde{\nu} = 3102, 2933, 2357, 1777, 1708, 1604, 1385, 1344, 1082, 883, 717$ .  $[\alpha]_{\text{D}}^{20} = +48.9$  (MeOH,  $c = 0.006$ ).

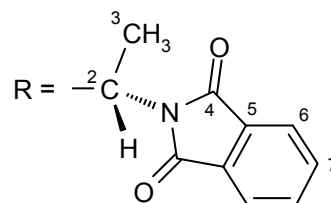

#### Dirhodium(II) tetrakis[*N*-phthaloyl-(*R*)-phenylglycinate] (PPG)

Yield: 48 %.  $^1\text{H}$  NMR recorded in  $\text{CDCl}_3$  (ppm):  $\delta = 5.55$  (s, 4H, H-2); 7.14 (m, 8H, H-4/4'); 7.22 (m, 8H, H-5/5'); 7.46 (m, 4H, H-6); 7.62 (m, 8H, H-10/10'); 7.77 (m, 8H, H-9/9').  $^{13}\text{C}$  NMR recorded in  $\text{CDCl}_3$  (ppm):  $\delta = 56.7$  ( $\text{CH}$ , C-2); 123.4 ( $\text{CH}$ , C-9/9'); 127.9 (C, C-6); 128.2 ( $\text{CH}$ , C-4/4'); 129.8 ( $\text{CH}$ , C-5/5'); 131.9 ( $\text{CH}$ , C-10/10'); 133.9 (C, C-8/8'); 135.9 (C, C-3); 166.9 (C=O, C-7/7'); 186.7 ( $\text{CO}_2$ , C-1). IR (solid,  $\text{cm}^{-1}$ ):  $\tilde{\nu} = 3012, 2919, 1770, 1713, 1610, 1378, 1110, 1075, 717, 696$ .  $[\alpha]_{\text{D}}^{20} = +672.7$  ( $\text{CHCl}_3$ ,  $c = 0.0073$ ).

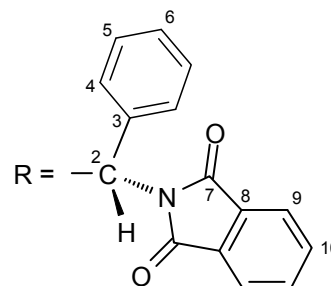

#### Dirhodium(II) tetrakis[*N*-succinyl-(*S*)-*tert*-leucinate] (StL)

Yield: 94 %.  $^1\text{H}$  NMR recorded in  $\text{CDCl}_3$  (ppm):  $\delta = 0.98$  (s, 36H, H-4); 2.82 (s, 16H, H-6/6'); 4.49 (s, 4H, H-2).  $^{13}\text{C}$  NMR recorded in  $\text{CDCl}_3$  (ppm):  $\delta = 28.4$  ( $\text{CH}_3$ , C-4); 31.9 ( $\text{CH}_2$ , C-6/6'); 35.9 (C, C-3); 61.6 ( $\text{CH}$ , C-2); 177.2 (C=O, C-5/5'); 186.4 ( $\text{CO}_2$ , C-1). IR (solid,  $\tilde{\nu}$  in  $\text{cm}^{-1}$ ): 2961, 2363, 1703, 1610, 1379, 1346, 1172, 769, 657.  $[\alpha]_{\text{D}}^{20} = +116.1$  (MeOH,  $c = 0.0031$ ).

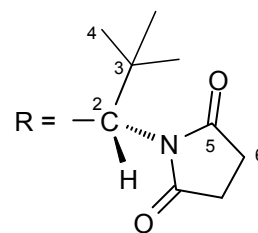

### Dirhodium(II) tetrakis[*N*-maleinyl-(*S*)-*tert*-leucinate] (MtL)

Yield: 78 %.  $^1\text{H}$  NMR recorded in  $\text{CDCl}_3$  (ppm):  $\delta = 0.99$  (s, 36H, H-4); 4.54 (s, 4H, H-2), 7.37 (s, 8H, H-6/6').  $^{13}\text{C}$  NMR recorded in  $\text{CDCl}_3$  (ppm):  $\delta = 27.8$  ( $\text{CH}_3$ , C-4); 35.3 (C, C-3); 61.3 (CH, C-2); 133.3 (CH, C-6/6'); 170.4 (C=O, C-5/5'); 187.3 ( $\text{CO}_2$ , C-1). IR (solid,  $\text{cm}^{-1}$ ):  $\tilde{\nu} = 2959, 2360, 1712, 1689, 1607, 1398, 1155, 830, 698$ .  $[\alpha]_{\text{D}}^{20} = -129.0$  (MeOH,  $c = 0.0031$ ).

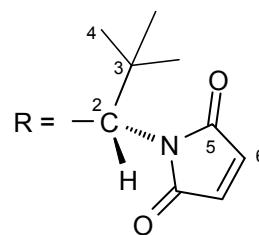

### Dirhodium(II) tetrakis[(*S*)-*N*-naphthalene-2,3-dicarboxyl-*tert*-leucinate] (N23tL)

Yield: 79 %.  $^1\text{H}$  NMR recorded in  $\text{CDCl}_3$  (ppm):  $\delta = 1.20$  (s, 36H, H-4); 5.04 (s, 4H, H-2), 7.61 (m, 8H, H-10/10'); 7.97 (s, 8H, H-9/9'); 8.26 (s, 8H, H-7/7').  $^{13}\text{C}$  NMR recorded in  $\text{CDCl}_3$  (ppm):  $\delta = 28.0$  ( $\text{CH}_3$ , C-4); 35.8 (C, C-3); 61.7 (CH, C-2); 124.6 (CH, C-10/10'); 127.8 (CH, C-9/9'); 128.7 (CH, C-7/7'); 130.2 (CH, C-6/6'); 135.5 (C, C-8/8'); 173.5 (C=O, C-5/5'); 187.2 ( $\text{CO}_2$ , C-1). IR (solid,  $\text{cm}^{-1}$ ):  $\tilde{\nu} = 3112, 2978, 2334, 1710, 1606, 1365, 1341, 773, 659$ .  $[\alpha]_{\text{D}}^{20} = -221.6$  (MeOH,  $c = 0.0037$ ).

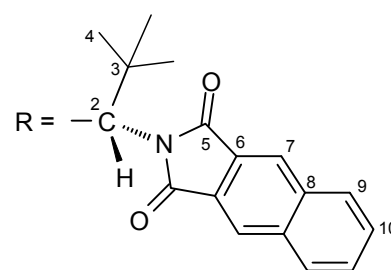

### Dirhodium(II) tetrakis[(*S*)-*N*-naphthalene-1,8-dicarboxyl-*tert*-leucinate] (N18tL)

Yield: 75 %.  $^1\text{H}$  NMR recorded in  $\text{CDCl}_3$  (ppm):  $\delta = 1.29$  (s, 36H, H-4); 5.83 (s, 4H, H-2), 7.58 (t, 4H, H-9); 7.84 (t, 4H, H-11); 8.04 (dd, 8H, H-8/12); 8.45 (d, 4H, H-13); 8.73 (d, 4H, H-7).  $^{13}\text{C}$  NMR recorded in  $\text{CDCl}_3$  (ppm):  $\delta = 28.9$  ( $\text{CH}_3$ , C-4); 36.2 (C, C-3); 61.9 (CH, C-2); 122.8 (C, C-6/14); 126.3 (C, C-15); 127.3 (CH, C-12); 127.9 (CH, C-8); 130.8 (CH, C-11); 130.8 (C, C-10); 131.2 (CH, C-9); 133.2 (CH, C-13); 133.5 (CH, C-7); 163.0 (C=O, C-16); 164.7 (C=O, C-5); 187.2 ( $\text{CO}_2$ , C-1). IR (solid,  $\text{cm}^{-1}$ ):  $\tilde{\nu} = 3010, 2920, 1705, 1663, 1604, 1588, 1397, 1375, 1338, 1237, 787, 777$ .  $[\alpha]_{\text{D}}^{20} = +92.5$  ( $\text{CHCl}_3$ ,  $c = 0.004$ ).

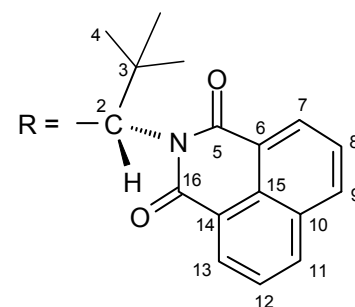

Note: in contrast to all other complexes, diastereotopic nuclei in the naphthyl residue are not isochronous pairwise. Here, local symmetry is no longer dominant for the chemical shifts of  $^1\text{H}$  and  $^{13}\text{C}$ .

### Dirhodium(II) tetrakis[*N*-2,3-anthracenedicarboxyl-(*S*)-*tert*-leucinate] (AtL)

Yield: 73 %.  $^1\text{H}$  NMR recorded in  $\text{CDCl}_3$  (ppm):  $\delta$  = 1.27 (s, 36H, H-4); 4.88 (s, 4H, H-2), 7.21 (m, 8H, H-12/12'); 7.63 (s, 8H, H-11/11'); 8.05 (m, 8H, H-9/9'); 8.50 (m, 8H, H-7/7').  $^{13}\text{C}$  NMR recorded in  $\text{CDCl}_3$  (ppm):  $\delta$  = 28.4 ( $\text{CH}_3$ , C-4); 36.1 (C, C-3); 60.6 (CH, C-2); 125.3 (CH, C-12/12'); 125.8 (CH, C-9/9'); 126.3 (CH, C-7/7'); 127.3 (CH, C-11/11'); 128.3 (CH, C-6/6'); 129.1 (CH, C-8/8'); 133.0 (CH, C-10/10'); 178.4 (C=O, C-5/5');  $\delta$  = 188.1 ( $\text{CO}_2$ , C-1). IR (solid,  $\text{cm}^{-1}$ ):  $\tilde{\nu} = 3010$ , 2925, 1769, 1709, 1609, 1365, 1337, 1133, 917, 741.  $[\alpha]_{\text{D}}^{20} = -1011.5$  ( $\text{CHCl}_3$ ,  $c = 0.0026$ ).

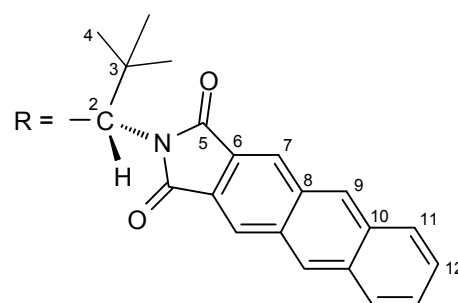

**Table S1**  $^1\text{H}$  /  $^{13}\text{C}$  chemical shifts of the ligands 2-butyldiphenylphosphane (**P**), 2-butylphenylselenide (**Se**), 2-butylphenylsulfide (**S**), 2-butylphenylether (**O**) and 2-butyl acetate (**C=O**); in  $\text{CDCl}_3$ .

| Atom #                | 1         | 2         | 3 <sup>a</sup>  | 4         | <i>ipso</i>   | <i>ortho</i> | <i>meta</i> | <i>para</i> |
|-----------------------|-----------|-----------|-----------------|-----------|---------------|--------------|-------------|-------------|
| <b>P</b> <sup>b</sup> | 1.03/15.6 | 2.23/31.8 | 1.24, 1.57/26.0 | 0.98/12.1 | -/137.4       | 7.48/133.4   | 7.31/128.2  | 7.31/128.5  |
| <b>Se</b>             | 1.40/21.6 | 3.24/41.5 | 1.61, 1.71/30.4 | 1.00/12.3 | -/127.2       | 7.54/134.8   | 7.26/128.8  | 7.26/129.5  |
| <b>S</b>              | 1.27/20.5 | 3.15/44.8 | 1.53, 1.66/29.4 | 1.00/11.4 | -/135.5       | 7.39/128.7   | 7.27/131.8  | 7.20/126.5  |
| <b>O</b>              | 1.29/19.3 | 4.29/74.9 | 1.60, 1.75/29.2 | 0.98/9.8  | -/158.2       | 7.26/115.9   | 6.90/129.4  | 6.90/120.4  |
|                       | 1         | 2         | 3               | 4         | $\text{CH}_3$ | $\text{C=O}$ |             |             |
| <b>C=O</b>            | 1.20/19.4 | 4.83/72.2 | 1.57/28.8       | 0.90/9.7  | 2.03/21.3     | 170.8        |             |             |

<sup>a</sup> Diastereotopic protons; no stereochemical assignment.

<sup>b</sup> Separate consistent data sets for each diastereotopic phenyl group but no stereochemical assignment.

**Table S2a**  $^1\text{H}$  and  $^{13}\text{C}$  complexations shifts  $\Delta\delta$ / diastereomeric dispersion effects  $\Delta\nu$  (integers in Hz) of 2-butyldiphenylphosphane (**P**) in the presence of an equimolar amount of dirhodium tetra-carboxylate complexes, in  $\text{CDCl}_3$ , recorded at 9.4 Tesla (400.1 MHz  $^1\text{H}$ , 100.6 MHz  $^{13}\text{C}$ ).<sup>a</sup>

| Atom #                        |                 | 1                 | 2          | 3 <sup>b</sup>            | 4           | <i>ipso</i>                            | <i>ortho</i>         | <i>meta</i>                            | <i>para</i>          |
|-------------------------------|-----------------|-------------------|------------|---------------------------|-------------|----------------------------------------|----------------------|----------------------------------------|----------------------|
| <b>Rh*</b>                    | $^1\text{H}$    | 0.26 / 7          | 0.79 / 0   | 0.07 / 0<br>0.66 / 0      | -0.03 / 6   | -                                      | 0.21 / 44            | n.d. <sup>c</sup> / n.d. <sup>c</sup>  | 0.04 / 0             |
|                               | $^{13}\text{C}$ | -2.2 / 0          | -1.0 / 3   | -2.1 / 0                  | 0.2 / 10    | -8.8 / 0<br>-8.8 / 0                   | 0.5 / 9<br>0.5 / 9   | n.d. <sup>c</sup><br>n.d. <sup>c</sup> | 1.4 / 13<br>1.5 / 9  |
| <b>M<math>\alpha</math>NP</b> | $^1\text{H}$    | coal <sup>d</sup> |            |                           |             |                                        |                      |                                        |                      |
|                               | $^{13}\text{C}$ | coal              |            |                           |             |                                        |                      |                                        |                      |
| <b>PtL</b>                    | $^1\text{H}$    | coal              |            |                           |             |                                        |                      |                                        |                      |
|                               | $^{13}\text{C}$ | coal              |            |                           |             |                                        |                      |                                        |                      |
| <b>TsA</b>                    | $^1\text{H}$    | 0.12 / 17         | 0.83 / 0   | 0.07 / 0<br>-0.11 / 0     | 0.03 / 37   | -                                      | 0.31 / 0             | 0.15 / 0                               | 0.21 / 0             |
|                               | $^{13}\text{C}$ | -2.3 / 0          | -1.3 / 7   | -2.1 / 0                  | 0.6 / 6     | -3.6 / 0<br>-3.5 / 3                   | -3.3 / 2<br>-3.6 / 2 | 0.2 / 3<br>0.4 / 3                     | 2.6 / 0<br>2.4 / 0   |
| <b>TsPA</b>                   | $^1\text{H}$    | coal              |            |                           |             |                                        |                      |                                        |                      |
|                               | $^{13}\text{C}$ | coal              |            |                           |             |                                        |                      |                                        |                      |
| <b>TsTp</b>                   | $^1\text{H}$    | coal              |            |                           |             |                                        |                      |                                        |                      |
|                               | $^{13}\text{C}$ | coal              |            |                           |             |                                        |                      |                                        |                      |
| <b>PA</b>                     | $^1\text{H}$    | -0.53 / 35        | -0.10 / 13 | -0.54 / 11<br>-0.04 / 0   | -0.64 / 36  | -                                      | -0.38 / 0            | -0.51 / 0                              | -0.21 / 0            |
|                               | $^{13}\text{C}$ | -3.4 / 0          | -1.2 / 0   | -3.0 / 0                  | -0.1 / 6    | -3.9 / 0<br>-3.9 / 0                   | -0.9 / 8<br>-1.2 / 8 | 0.5 / 0<br>0.3 / 0                     | 0.6 / 2<br>0.7 / 0   |
| <b>PPG</b>                    | $^1\text{H}$    | coal              |            |                           |             |                                        |                      |                                        |                      |
|                               | $^{13}\text{C}$ | coal              |            |                           |             |                                        |                      |                                        |                      |
| <b>StL</b>                    | $^1\text{H}$    | coal              |            |                           |             |                                        |                      |                                        |                      |
|                               | $^{13}\text{C}$ | coal              |            |                           |             |                                        |                      |                                        |                      |
| <b>MtL</b>                    | $^1\text{H}$    | -0.28 / 3         | 0.06 / 0   | -0.20 / 0<br>-0.03 / 0    | -0.16 / 0   | -                                      | -0.16 / 0            | -0.15 / 0                              | -0.10 / 0            |
|                               | $^{13}\text{C}$ | -2.4 / 0          | 0.2 / 4    | -2.9 / 0                  | 0.8 / 0     | -3.8 / 0<br>-3.8 / 0                   | -1.0 / 0<br>-1.0 / 0 | -0.1 / 0<br>0 / 0                      | 0.5 / 0<br>0.5 / 0   |
| <b>N23tL</b>                  | $^1\text{H}$    | -1.06 / 86        | -0.85 / 0  | -0.84 / 135<br>-0.74 / 0  | -1.46 / 117 | -                                      | -0.88 / 65           | -1.10 / 9                              | -0.81 / 0            |
|                               | $^{13}\text{C}$ | -3.4 / 0          | -0.7 / 14  | -3.3 / 0                  | -0.8 / 31   | -4.7 / 0<br>-4.8 / 0                   | -1.7 / 0<br>-2.5 / 0 | -1.4 / 39<br>-1.9 / 39                 | -0.2 / 3<br>-0.7 / 2 |
| <b>N18tL</b>                  | $^1\text{H}$    | -1.40 / 82        | -1.09 / 0  | -1.40 / 47<br>-1.06 / 117 | -1.94 / 56  | -                                      | -1.13 / 18           | -0.63 / 46                             | -2.06 / 197          |
|                               | $^{13}\text{C}$ | -3.7 / 41         | -1.3 / 120 | -0.5 / 3                  | -1.6 / 10   | n.d. <sup>c</sup><br>n.d. <sup>c</sup> | -2.4 / 6<br>-2.2 / 6 | -2.6 / 17<br>-2.8 / 17                 | 1.5 / 0<br>1.6 / 0   |
| <b>AtL</b>                    | $^1\text{H}$    | coal              |            |                           |             |                                        |                      |                                        |                      |
|                               | $^{13}\text{C}$ | coal              |            |                           |             |                                        |                      |                                        |                      |

<sup>a</sup> Separate data sets for the diastereotopic phenyl groups; no stereochemical assignment.

<sup>b</sup> Diastereotopic protons; no stereochemical assignment.

<sup>c</sup> Not detectable, n.d., due to signal complexity or overlap.

<sup>d</sup> Not detectable at room temperature due to signal broadening by coalescence (coal).

**Table S2b** Complexations shifts  $\Delta\delta$ / diastereomeric dispersion effects  $\Delta\nu$  (integers in Hz) of 2-butylphenylselenide (**Se**) in the presence of an equimolar amount of dirhodium tetracarboxylate complexes, in  $\text{CDCl}_3$ , recorded at 9.4 Tesla (400 MHz  $^1\text{H}$ , 100.6 MHz  $^{13}\text{C}$ ).

| Atom #                        |                 | 1                 | 2          | 3 <sup>a</sup>                  | 4          | <i>ipso</i>       | <i>ortho</i> | <i>meta</i> | <i>para</i>                           |
|-------------------------------|-----------------|-------------------|------------|---------------------------------|------------|-------------------|--------------|-------------|---------------------------------------|
| <b>Rh*</b>                    | $^1\text{H}$    | 0.10 / 2          | 0.63 / 2   | 0.24 / 0<br>0.27 / 1            | -0.02 / 4  | -                 | 0.26 / 1     | -0.09 / 0   | 0.05 / 0                              |
|                               | $^{13}\text{C}$ | -2.9 / 8          | 4.5 / 0    | -1.9 / 2                        | -0.6 / 3   | -1.1 / 0          | 0 / 0        | 0.2 / 0     | -0.1 / 0                              |
| <b>M<math>\alpha</math>NP</b> | $^1\text{H}$    | -0.44 / 11        | -0.16 / 0  | 0 / 0<br>0 / 0                  | -0.26 / 15 | -                 | -0.56 / 0    | -0.19 / 0   | -0.19 / 0                             |
|                               | $^{13}\text{C}$ | -3.3 / 10         | 3.2 / 8    | -2.1 / 11                       | -0.6 / 13  | n.d. <sup>b</sup> | 0.1 / 6      | -0.8 / 3    | n.d. <sup>b</sup>                     |
| <b>PtL</b>                    | $^1\text{H}$    | -1.17 / 49        | -0.91 / 45 | -0.68 / 0<br>-0.91 / 40         | -0.95 / 22 | -                 | -0.66 / 0    | -0.72 / 14  | -0.52 / 7                             |
|                               | $^{13}\text{C}$ | -3.1 / 18         | 4.2 / 53   | 1.2 / 0                         | -0.5 / 14  | n.d. <sup>b</sup> | -0.8 / 0     | -1.0 / 5    | -1.7 / 5                              |
| <b>TsA</b>                    | $^1\text{H}$    | 0.20 / 7          | 0.72 / 0   | 0.11 / 0<br>0.13 / 0            | 0.13 / 2   | -                 | 0.32 / 0     | 0.18 / 0    | 0.18 / 0                              |
|                               | $^{13}\text{C}$ | -2.7 / 5          | 4.0 / 10   | -1.7 / 7                        | -0.4 / 13  | -0.7 / 0          | -0.1 / 3     | 0.4 / 0     | -2.2 / 6                              |
| <b>TsPA</b>                   | $^1\text{H}$    | 0.21 / 27         | 0.84 / 0   | 0.24 / 0<br>0.42 / 0            | 0.12 / 9   | -                 | 0.33 / 0     | -0.56 / 0   | -0.56 / 0                             |
|                               | $^{13}\text{C}$ | -2.5 / 6          | 3.4 / 13   | -1.6 / 8                        | -0.5 / 18  | 1.4 / 0           | 0.2 / 0      | 0.8 / 0     | n.d. <sup>b</sup> / n.d. <sup>b</sup> |
| <b>TsTp</b>                   | $^1\text{H}$    | coal <sup>c</sup> |            |                                 |            |                   |              |             |                                       |
|                               | $^{13}\text{C}$ | coal <sup>c</sup> |            |                                 |            |                   |              |             |                                       |
| <b>PA</b>                     | $^1\text{H}$    | -0.60 / 13        | -0.15 / 0  | -0.31 / 0<br>-0.51 / 0          | -0.20 / 16 | -                 | -0.05 / 11   | -0.26 / 0   | -0.26 / 0                             |
|                               | $^{13}\text{C}$ | -3.1 / 6          | 3.7 / 0    | -2.0 / 33                       | -0.4 / 6   | -0.4 / 18         | 0.2 / 21     | -0.6 / 6    | -1.4 / 6                              |
| <b>PPG</b>                    | $^1\text{H}$    | coal <sup>c</sup> |            |                                 |            |                   |              |             |                                       |
|                               | $^{13}\text{C}$ | coal <sup>c</sup> |            |                                 |            |                   |              |             |                                       |
| <b>StL</b>                    | $^1\text{H}$    | -0.08 / 34        | 0.10 / 24  | -0.04 / 18<br>0.08 / 0          | 0.03 / 0   | -                 | 0.22 / 0     | 0.08 / 0    | 0.14 / 0                              |
|                               | $^{13}\text{C}$ | -2.1 / 25         | 4.3 / 51   | -1.4 / 25                       | 0.4 / 17   | -0.5 / 31         | 1.0 / 10     | 0.1 / 3     | -0.5 / 8                              |
| <b>MtL</b>                    | $^1\text{H}$    | -0.08 / 32        | 0.15 / 13  | -0.05 / 10<br>0 / 0             | -0.01 / 14 | -                 | 0.22 / 0     | 0.03 / 0    | 0.03 / 0                              |
|                               | $^{13}\text{C}$ | -1.5 / 2          | 3.4 / 17   | -1.1 / 25                       | 0.5 / 7    | -0.3 / 13         | -1.2 / 0     | 0 / 3       | -1.1 / 5                              |
| <b>N23tL</b>                  | $^1\text{H}$    | -1.07 / 36        | -0.85 / 59 | -0.80 / 43<br>n.d. <sup>b</sup> | -1.09 / 15 | -                 | -0.44 / 0    | -0.81 / 0   | -0.28 / 0                             |
|                               | $^{13}\text{C}$ | -2.5 / 0          | 3.3 / 17   | -1.9 / 0                        | -0.6 / 32  | 0.1 / 3           | 0 / 6        | -1.2 / 10   | -1.6 / 0                              |
| <b>N18tL</b>                  | $^1\text{H}$    | coal <sup>c</sup> |            |                                 |            |                   |              |             |                                       |
|                               | $^{13}\text{C}$ | coal <sup>c</sup> |            |                                 |            |                   |              |             |                                       |
| <b>AtL</b>                    | $^1\text{H}$    | coal <sup>c</sup> |            |                                 |            |                   |              |             |                                       |
|                               | $^{13}\text{C}$ | coal <sup>c</sup> |            |                                 |            |                   |              |             |                                       |

<sup>a</sup> Diastereotopic protons; no stereochemical assignment.

<sup>b</sup> Not detectable, n.d., due to signal complexity or overlap.

<sup>c</sup> Not detectable at room temperature due to signal broadening by coalescence (coal).



**Table S2c** Complexations shifts  $\Delta\delta$ / diastereomeric dispersion effects  $\Delta\nu$  (integers in Hz) of 2-butylphenylsulfide (**S**) in the presence of an equimolar amount of dirhodium tetracarboxylate complexes, in  $\text{CDCl}_3$ , recorded at 9.4 Tesla (400 MHz  $^1\text{H}$ , 100.6 MHz  $^{13}\text{C}$ ).

| Atom #                        |                 | 1                 | 2          | 3 <sup>a</sup>                  | 4          | <i>ipso</i> | <i>ortho</i>      | <i>meta</i>       | <i>para</i> |  |
|-------------------------------|-----------------|-------------------|------------|---------------------------------|------------|-------------|-------------------|-------------------|-------------|--|
| <b>Rh*</b>                    | $^1\text{H}$    | 0.18 / 5          | 0.61 / 0   | 0.13 / 0<br>0.44 / 0            | 0.01 / 4   | -           | 0.39 / 0          | n.d. <sup>b</sup> | 0.10 / 0    |  |
|                               | $^{13}\text{C}$ | -2.5 / 11         | 3.4 / 7    | -1.8 / 4                        | -0.3 / 11  | -6.1 / 0    | 0.1 / 1           | 2.3 / 3           | 2.6 / 0     |  |
| <b>M<math>\alpha</math>NP</b> | $^1\text{H}$    | -0.52 / 6         | -1.69 / 7  | -0.67 / 0<br>-0.47 / 0          | -0.33 / 23 | -           | n.d.              | -0.06 / 0         | 0.28 / 0    |  |
|                               | $^{13}\text{C}$ | -3.5 / 6          | 2.1 / 0    | -2.4 / 5                        | -0.7 / 9   | -6.5 / 0    | -0.7 / 12         | 1.3 / 25          | 4.1 / 0     |  |
| <b>PtL</b>                    | $^1\text{H}$    | -1.09 / 39        | -0.93 / 32 | -0.93 / 0<br>-1.22 / 43         | -0.94 / 17 | -           | -0.59 / 0         | -0.82 / 0         | -0.59 / 31  |  |
|                               | $^{13}\text{C}$ | -2.9 / 21         | 3.4 / 55   | -2.3 / 52                       | -1.0 / 25  | -2.2 / 0    | -0.9 / 8          | -4.5 / 6          | 2.7 / 0     |  |
| <b>TsA</b>                    | $^1\text{H}$    | 0.24 / 6          | 0.70 / 0   | 0.21 / 3<br>0.39 / 4            | 0.13 / 2   | -           | 0.05 / 0          | 0.05 / 0          | 0.01 / 0    |  |
|                               | $^{13}\text{C}$ | -2.3 / 0          | 2.2 / 13   | -1.6 / 0                        | -0.3 / 15  | -2.3 / 7    | 0.1 / 3           | -2.1 / 0          | 0 / 0       |  |
| <b>TsPA</b>                   | $^1\text{H}$    | 0.21 / 20         | 0.71 / 0   | 0.20 / 0<br>0.34 / 0            | 0.10 / 7   | -           | 0.35 / 0          | 0.06 / 0          | 0.13 / 0    |  |
|                               | $^{13}\text{C}$ | -1.9 / 7          | 1.5 / 13   | -1.2 / 0                        | -0.3 / 14  | -2.2 / 0    | 0.1 / 0           | -3.7 / 0          | -0.1 / 0    |  |
| <b>TsTp</b>                   | $^1\text{H}$    | coal <sup>c</sup> |            |                                 |            |             | coal <sup>c</sup> |                   |             |  |
|                               | $^{13}\text{C}$ | coal <sup>c</sup> |            |                                 |            |             | coal <sup>c</sup> |                   |             |  |
| <b>PA</b>                     | $^1\text{H}$    | -0.57 / 29        | -0.19 / 0  | -0.52 / 1<br>-0.30 / 1          | -0.49 / 12 | -           | -0.04 / 0         | -0.38 / 0         | -0.24 / 0   |  |
|                               | $^{13}\text{C}$ | -3.1 / 7          | 3.1 / 17   | -2.1 / 27                       | -0.4 / 14  | -1.6 / 0    | -0.9 / 0          | -1.7 / 0          | 1.4 / 8     |  |
| <b>PPG</b>                    | $^1\text{H}$    | -1.27 / 0         | -0.31 / 0  | -0.66 / 0<br>-0.74 / 0          | -0.53 / 0  | -           | 0.11 / 0          | 0.03 / 0          | 0.10 / 0    |  |
|                               | $^{13}\text{C}$ | -2.8 / 0          | 2.4 / 0    | -2.0 / 0                        | -0.3 / 0   | 0.4 / 2     | 0.3 / 4           | 0.3 / 3           | -0.3 / 0    |  |
| <b>StL</b>                    | $^1\text{H}$    | 0.03 / 19         | 0.15 / 14  | 0.03 / 13<br>0.17 / 11          | 0.08 / 3   | -           | 0.40 / 0          | 0.11 / 0          | 0.18 / 0    |  |
|                               | $^{13}\text{C}$ | -1.3 / 11         | 4.0 / 35   | -1.1 / 18                       | 0.8 / 14   | -0.3 / 21   | -0.1 / 2          | -0.8 / 5          | 2.3 / 5     |  |
| <b>MtL</b>                    | $^1\text{H}$    | -0.08 / 22        | -0.01 / 9  | 0.07 / 12<br>0.08 / 11          | -0.01 / 6  | -           | 0.26 / 0          | 0.08 / 0          | 0.15 / 0    |  |
|                               | $^{13}\text{C}$ | -1.2 / 6          | 3.3 / 9    | -1.0 / 23                       | 0.7 / 8    | -0.5 / 0    | -0.1 / 2          | 1.8 / 0           | 1.9 / 0     |  |
| <b>N23tL</b>                  | $^1\text{H}$    | -0.96 / 38        | -0.82 / 54 | -0.74 / 65<br>n.d. <sup>b</sup> | -1.05 / 25 | -           | n.d. <sup>b</sup> | 0.05 / 0          | 0.12 / 0    |  |
|                               | $^{13}\text{C}$ | -2.2 / 0          | 3.0 / 37   | -2.1 / 53                       | -0.5 / 23  | -1.5 / 4    | -1.4 / 0          | -4.4 / 0          | 1.5 / 0     |  |
| <b>N18tL</b>                  | $^1\text{H}$    | coal <sup>c</sup> |            |                                 |            |             | coal <sup>c</sup> |                   |             |  |
|                               | $^{13}\text{C}$ | coal <sup>c</sup> |            |                                 |            |             | coal <sup>c</sup> |                   |             |  |
| <b>AtL</b>                    | $^1\text{H}$    | -0.66 / 46        | -0.87 / 99 | -0.47 / 0<br>-0.12 / 0          | -0.82 / 27 | -           | 0.28 / 0          | -0.09 / 0         | -0.09 / 0   |  |
|                               | $^{13}\text{C}$ | -1.6 / 4          | 2.6 / 29   | -1.6 / 48                       | -0.2 / 21  | -1.3 / 0    | -1.2 / 5          | -4.2 / 0          | 1.2 / 0     |  |

<sup>a</sup> Diastereotopic protons; no stereochemical assignment.

<sup>b</sup> Not detectable, n.d., due to signal complexity or overlap.

<sup>c</sup> Not detectable at room temperature due to signal broadening by coalescence (coal).

**Table S2d** Complexations shifts  $\Delta\delta$ / diastereomeric dispersion effects  $\Delta\nu$  (integers in Hz) of 2-butylphenylether (**O**) in the presence of an equimolar amount of dirhodium tetracarboxylate complexes, in  $\text{CDCl}_3$ , recorded at 9.4 Tesla (400 MHz  $^1\text{H}$ , 100.6 MHz  $^{13}\text{C}$ ).

| Atom #       |                 | 1         | 2         | 3 <sup>a</sup>         | 4         | <i>ipso</i> | <i>ortho</i>      | <i>meta</i> | <i>para</i> |
|--------------|-----------------|-----------|-----------|------------------------|-----------|-------------|-------------------|-------------|-------------|
| <b>Rh*</b>   | $^1\text{H}$    | 0.01 / 0  | 0.02 / 0  | 0.02 / 0<br>0.02 / 0   | -0.01 / 0 | -           | n.d. <sup>b</sup> | 0.02 / 0    | 0.02 / 0    |
|              | $^{13}\text{C}$ | 0 / 0     | 0.6 / 4   | 0 / 1                  | 0 / 1     | 0 / 1       | 0.4 / 0           | 0.1 / 2     | 0 / 1       |
| <b>MaNP</b>  | $^1\text{H}$    | 0 / 0     | 0.01 / 0  | 0.01 / 0<br>0 / 0      | 0 / 0     | -           | n.d.              | 0 / 3       | 0 / 3       |
|              | $^{13}\text{C}$ | 0 / 0     | 0 / 0     | 0 / 0                  | 0 / 0     | 0 / 0       | 0 / 0             | 0 / 1       | 0 / 0       |
| <b>PtL</b>   | $^1\text{H}$    | -0.02 / 3 | -0.01 / 4 | -0.02 / 0<br>-0.02 / 0 | -0.03 / 4 | -           | -0.37 / 0         | 0.33 / 0    | -0.01 / 0   |
|              | $^{13}\text{C}$ | 0 / 1     | 0.3 / 15  | -0.1 / 1               | 0 / 1     | 0 / 3       | 0.2 / 5           | 0 / 2       | 0 / 2       |
| <b>TsA</b>   | $^1\text{H}$    | 0 / 0     | 0.01 / 0  | 0.02 / 0<br>0 / 0      | 0 / 0     | -           | 0.01 / 0          | 0 / 0       | 0.03 / 0    |
|              | $^{13}\text{C}$ | 0 / 0     | 0 / 0     | 0 / 0                  | 0 / 2     | 0 / 1       | 0 / 0             | 0 / 0       | 0 / 0       |
| <b>TsPA</b>  | $^1\text{H}$    | 0 / 0     | 0.01 / 0  | 0.01 / 0<br>0 / 0      | 0 / 0     | -           | 0.01 / 0          | 0 / 0       | 0 / 0       |
|              | $^{13}\text{C}$ | 0 / 0     | 0 / 0     | 0 / 0                  | 0 / 0     | 0 / 0       | 0 / 0             | 0 / 0       | 0 / 0       |
| <b>TsTp</b>  | $^1\text{H}$    | 0 / 0     | 0 / 0     | 0 / 0<br>0 / 0         | 0 / 0     | -           | 0 / 0             | 0 / 0       | 0 / 0       |
|              | $^{13}\text{C}$ | -0.1 / 0  | -0.1 / 0  | -0.1 / 0               | -0.1 / 0  | 0 / 0       | -0.1 / 0          | -0.1 / 0    | -0.1 / 0    |
| <b>PA</b>    | $^1\text{H}$    | 0 / 1     | 0 / 0     | 0.06 / 0<br>0 / 0      | -0.01 / 0 | -           | 0.01 / 0          | 0 / 0       | 0 / 0       |
|              | $^{13}\text{C}$ | 0 / 0     | 0.1 / 3   | 0 / 0                  | 0 / 0     | 0 / 1       | 0 / 1             | 0 / 0       | 0 / 1       |
| <b>PPG</b>   | $^1\text{H}$    | -0.01 / 0 | -0.01 / 0 | 0.01 / 0<br>-0.01 / 0  | -0.01 / 0 | -           | -0.12 / 0         | -0.02 / 0   | -0.02 / 0   |
|              | $^{13}\text{C}$ | 0 / 0     | 0.1 / 0   | 0 / 0                  | 0 / 0     | 0 / 0       | 0 / 0             | 0 / 0       | 0 / 0       |
| <b>StL</b>   | $^1\text{H}$    | 0.13 / 0  | 0.13 / 0  | 0.09 / 0<br>0.14 / 0   | 0.14 / 0  | -           | 0.14 / 0          | 0.12 / 0    | 0.12 / 0    |
|              | $^{13}\text{C}$ | 0 / 0     | -0.1 / 0  | 0 / 0                  | 0 / 0     | 0 / 0       | 0 / 0             | 0 / 0       | 0 / 0       |
| <b>MtL</b>   | $^1\text{H}$    | 0 / 0     | 0.01 / 0  | 0.02 / 0<br>0 / 0      | 0 / 0     | -           | 0 / 0             | 0 / 0       | 0 / 0       |
|              | $^{13}\text{C}$ | 0 / 0     | 0 / 0     | 0 / 0                  | 0 / 1     | 0 / 1       | 0 / 1             | 0 / 0       | 0 / 0       |
| <b>N23tL</b> | $^1\text{H}$    | -0.02 / 6 | -0.01 / 4 | -0.01 / 6<br>-0.02 / 1 | -0.03 / 3 | -           | 0.05 / 5          | -0.03 / 2   | 0.02 / 3    |
|              | $^{13}\text{C}$ | 0 / 0     | 0.2 / 9   | -0.1 / 1               | 0 / 1     | 0 / 2       | 0.1 / 3           | 0 / 1       | 0 / 1       |
| <b>N18tL</b> | $^1\text{H}$    | -0.02 / 3 | -0.01 / 4 | -0.01 / 2<br>-0.01 / 5 | -0.02 / 4 | -           | 0.01 / 0          | 0 / 0       | 0 / 0       |
|              | $^{13}\text{C}$ | 0 / 0     | 0.1 / 7   | 0 / 0                  | 0 / 0     | 0 / 1       | 0 / 2             | 0 / 1       | -0.1 / 0    |
| <b>AtL</b>   | $^1\text{H}$    | 0 / 0     | 0.01 / 0  | 0.01 / 0<br>-0.01 / 0  | 0 / 0     | -           | 0 / 0             | -0.01 / 0   | 0.02 / 0    |
|              | $^{13}\text{C}$ | 0 / 0     | 0 / 0     | 0 / 0                  | 0 / 1     | 0 / 1       | 0 / 1             | 0 / 2       | 0 / 0       |

<sup>a</sup> Diastereotopic protons; no stereochemical assignment.

<sup>b</sup> Not detectable, n.d., due to signal complexity or overlap.

**Table S2e** Complexations shifts  $\Delta\delta$ / diastereomeric dispersion effects  $\Delta\nu$  (integers in Hz) of 2-butyacetate (C=O) in the presence of an equimolar amount of dirhodium tetracarboxylate complexes, in CDCl<sub>3</sub>, recorded at 9.4 Tesla (400 MHz <sup>1</sup>H, 100.6 MHz <sup>13</sup>C).

| Atom #       |                 | 1          | 2                 | 3 <sup>a</sup> | 4         | CH <sub>3</sub> | C=O               |
|--------------|-----------------|------------|-------------------|----------------|-----------|-----------------|-------------------|
| <b>Rh*</b>   | <sup>1</sup> H  | 0.05 / 2   | 0.18 / 6          | 0.05 / 1       | 0.01 / 1  | 0.13 / 1        | -                 |
|              | <sup>13</sup> C | -0.1 / 1   | 1.1 / 1           | 0 / 0          | 0 / 0     | 0 / 0           | 2.7 / 0           |
| <b>MαNP</b>  | <sup>1</sup> H  | 0 / 0      | 0 / 0             | -0.01 / 0      | 0 / 0     | 0 / 0           | -                 |
|              | <sup>13</sup> C | 0 / 1      | 0.1 / 0           | 0 / 0          | 0 / 1     | 0 / 0           | 0.2 / 1           |
| <b>PtL</b>   | <sup>1</sup> H  | -0.04 / 6  | -0.35 / 2         | -0.05 / 2      | -0.04 / 4 | -0.01 / 2       | -                 |
|              | <sup>13</sup> C | -0.1 / 3   | 0.4 / 2           | -0.1 / 1       | 0 / 1     | 0 / 1           | 1.0 / 2           |
| <b>TsA</b>   | <sup>1</sup> H  | 0 / 0      | 0.01 / 0          | -0.01 / 0      | 0.30 / 0  | 0.01 / 0        | -                 |
|              | <sup>13</sup> C | 0 / 0      | 0.1 / 0           | 0 / 0          | 0 / 0     | 0.1 / 0         | 0.2 / 0           |
| <b>TsPA</b>  | <sup>1</sup> H  | 0 / 0      | 0.01 / 0          | -0.01 / 0      | 0 / 0     | 0.01 / 0        | -                 |
|              | <sup>13</sup> C | 0 / 0      | 0.1 / 0           | 0 / 0          | 0 / 0     | 0 / 0           | n.d. <sup>b</sup> |
| <b>TsTp</b>  | <sup>1</sup> H  | 0 / 0      | 0.01 / 0          | -0.01 / 0      | 0 / 0     | 2.81 / 0        | -                 |
|              | <sup>13</sup> C | 0 / 0      | 0 / 0             | 0 / 0          | 0 / 0     | 0 / 0           | 0.1 / 0           |
| <b>PA</b>    | <sup>1</sup> H  | -0.54 / 31 | -1.92 / 0         | 0.10 / 0       | -0.40 / 4 | -0.15 / 0       | -                 |
|              | <sup>13</sup> C | -2.2 / 7   | n.d. <sup>b</sup> | -1.5 / 36      | -1.3 / 14 | -0.3 / 0        | 0.6 / 0           |
| <b>PPG</b>   | <sup>1</sup> H  | -0.05 / 0  | 0.02 / 0          | -0.03 / 0      | -0.03 / 0 | -0.05 / 0       | -                 |
|              | <sup>13</sup> C | -0.1 / 0   | 0.4 / 0           | -0.1 / 1       | -0.1 / 1  | -0.1 / 0        | 1.2 / 0           |
| <b>StL</b>   | <sup>1</sup> H  | 0 / 0      | 0 / 0             | -0.01 / 0      | -0.01 / 0 | 0.01 / 0        | -                 |
|              | <sup>13</sup> C | 0 / 0      | 0.1 / 0           | 0 / 0          | 0 / 1     | 0 / 1           | 0.1 / 0           |
| <b>MtL</b>   | <sup>1</sup> H  | 0.02 / 0   | 0.02 / 0          | 0.01 / 0       | 0 / 0     | 0.02 / 0        | -                 |
|              | <sup>13</sup> C | 0 / 0      | 0.1 / 0           | 0 / 0          | 0 / 0     | 0.1 / 0         | -0.4 / 0          |
| <b>N23tL</b> | <sup>1</sup> H  | -0.13 / 6  | -0.07 / 0         | -0.14 / 0      | -0.13 / 7 | -0.06 / 3       | -                 |
|              | <sup>13</sup> C | -0.2 / 5   | 0.4 / 2           | -0.2 / 2       | -0.1 / 2  | -0.1 / 0        | 1.1 / 2           |
| <b>N18tL</b> | <sup>1</sup> H  | -0.05 / 2  | -0.04 / 0         | -0.13 / 0      | -0.05 / 2 | -0.01 / 0       | -                 |
|              | <sup>13</sup> C | -0.1 / 1   | 0.1 / 0           | -0.1 / 0       | 0 / 1     | 0 / 0           | 0.4 / 0           |
| <b>AtL</b>   | <sup>1</sup> H  | -0.01 / 0  | 0.04 / 0          | -0.02 / 0      | -0.01 / 0 | 0 / 0           | -                 |
|              | <sup>13</sup> C | 0 / 1      | 0 / 0             | -0.5 / 0       | 0 / 1     | 0 / 1           | 0.1 / 1           |

<sup>a</sup> Diastereotopic protons; no stereochemical assignment.

<sup>b</sup> Not detectable, n.d., due to signal complexity or overlap.

**Table S3** X-ray data and ORTEP plot of the bis(methanol) adduct of N2tL.

**checkCIF/PLATON report**

No syntax errors found. CIF dictionary Interpreting this report

**Datablock: d\_14ag1x**

---

Bond precision: C-C = 0.0063 Å Wavelength=0.71067

Cell: a=28.965(14) b=36.811(18) c=15.395(16)  
alpha=90 beta=90 gamma=90

Temperature: 100 K

|                        | Calculated                                           | Reported                                          |
|------------------------|------------------------------------------------------|---------------------------------------------------|
| Volume                 | 16415(20)                                            | 16415(20)                                         |
| Space group            | P 21 21 2                                            | P21212                                            |
| Hall group             | P 2 2ab                                              | P 2 2ab                                           |
| Moiety formula         | 4(C74 H70 N4 O18 Rh2),<br>16(C H3 O), 4(C H3), 13(O) | 2(C74 H72 N4 O18 Rh2),<br>4.5(H2 O), 10(C1 H4 O1) |
| Sum formula            | C316 H340 N16 O101 Rh8                               | C159 H215 N8 O50.5 Rh4                            |
| Mr                     | 6801.34                                              | 3458.04                                           |
| Dx, g cm <sup>-3</sup> | 1.376                                                | 1.399                                             |
| Z                      | 2                                                    | 4                                                 |
| Mu (mm <sup>-1</sup> ) | 0.473                                                | 0.481                                             |
| F000                   | 7032.0                                               | 7236.0                                            |
| F000'                  | 7017.96                                              |                                                   |
| h,k,lmax               | 36,46,19                                             | 36,44,18                                          |
| Nref                   | 18907 [ 35221]                                       | 33748                                             |
| Tmin,Tmax              |                                                      |                                                   |
| Tmin'                  |                                                      |                                                   |

Correction method= Not given

Data completeness= 1.78/0.96 Theta(max)= 26.820

R(reflections)= 0.0418( 31041) wR2(reflections)= 0.1054( 33748)

S = 1.079 Npar= 2058

---

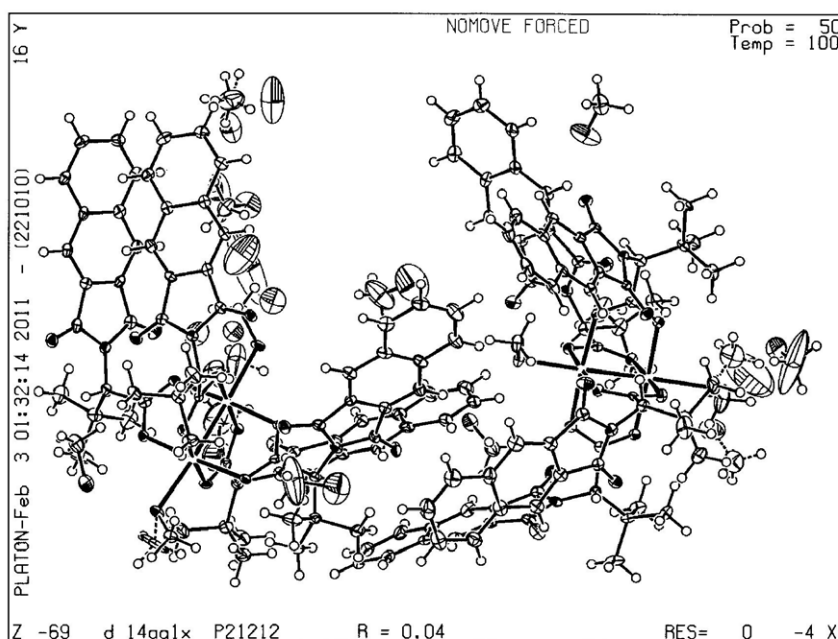

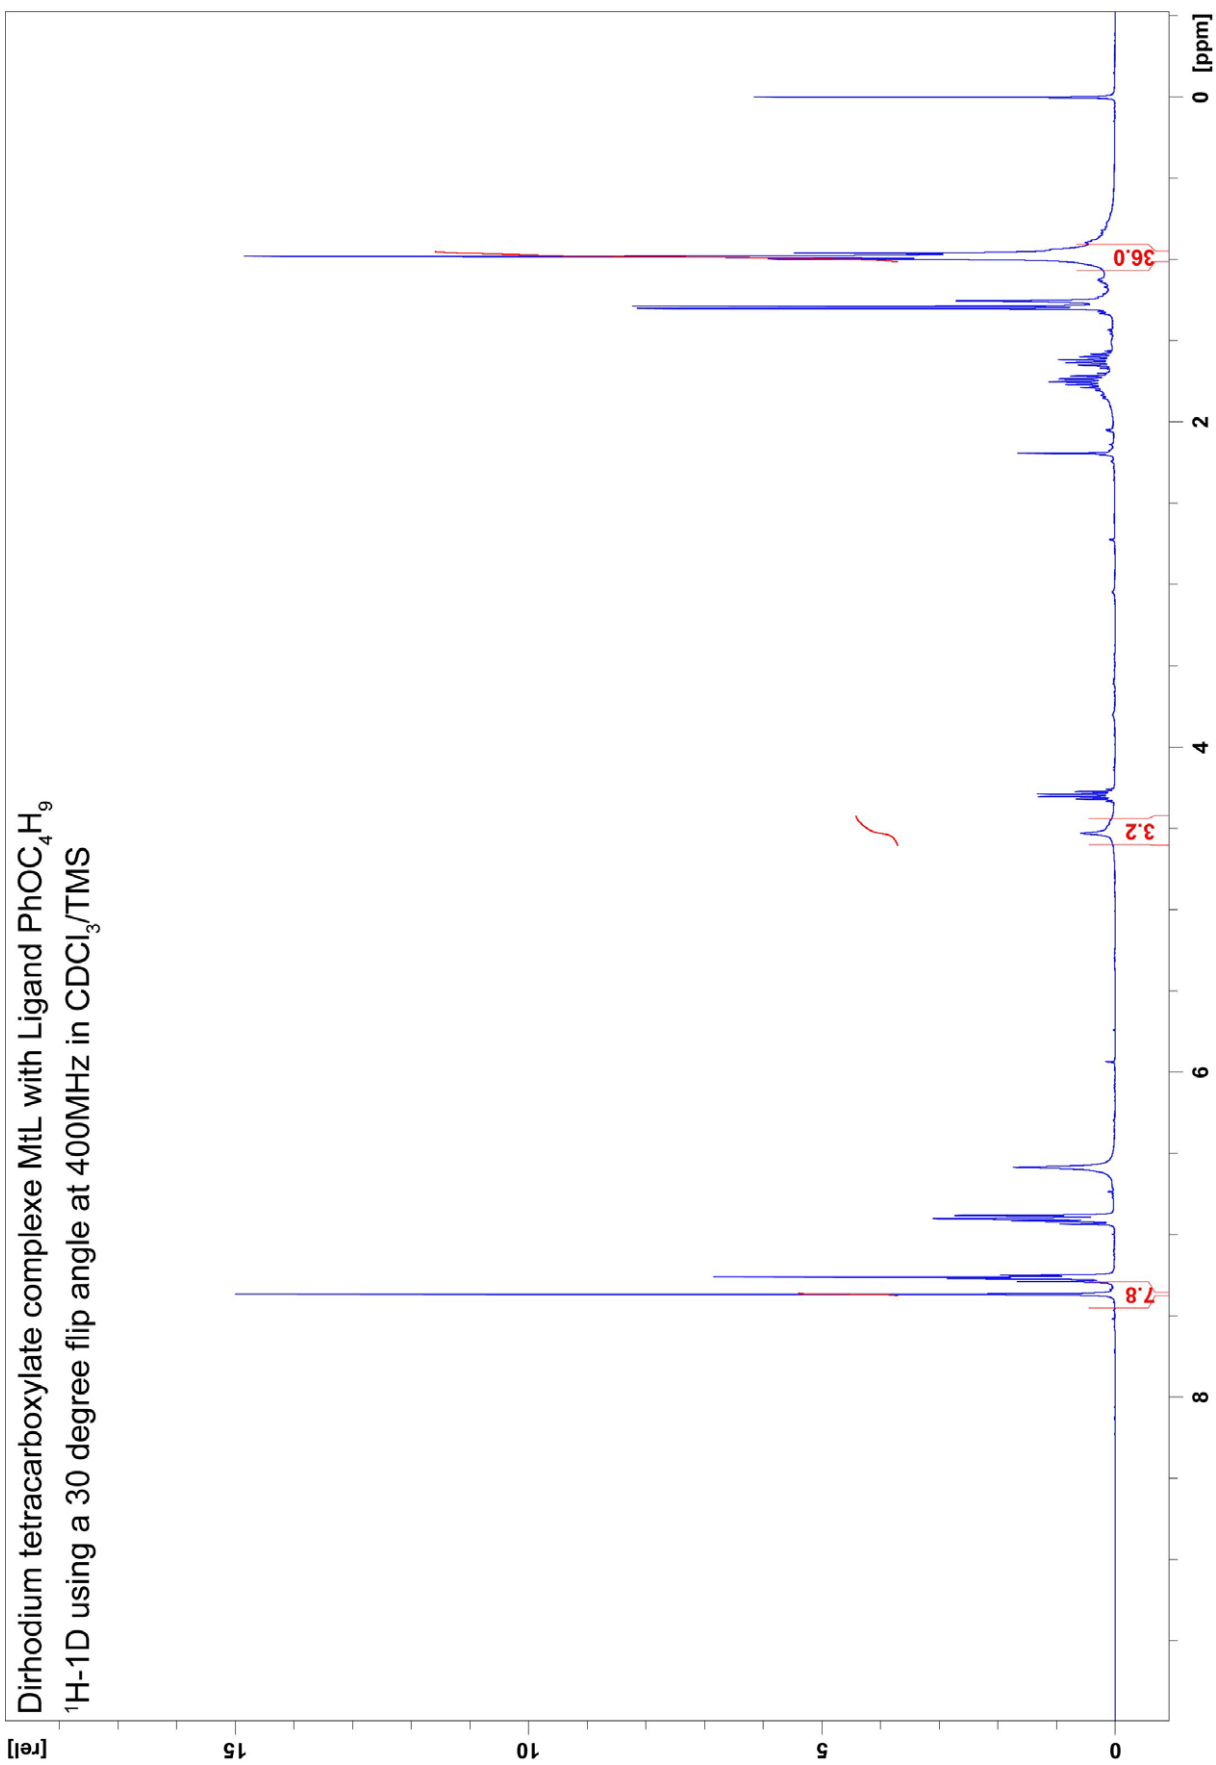

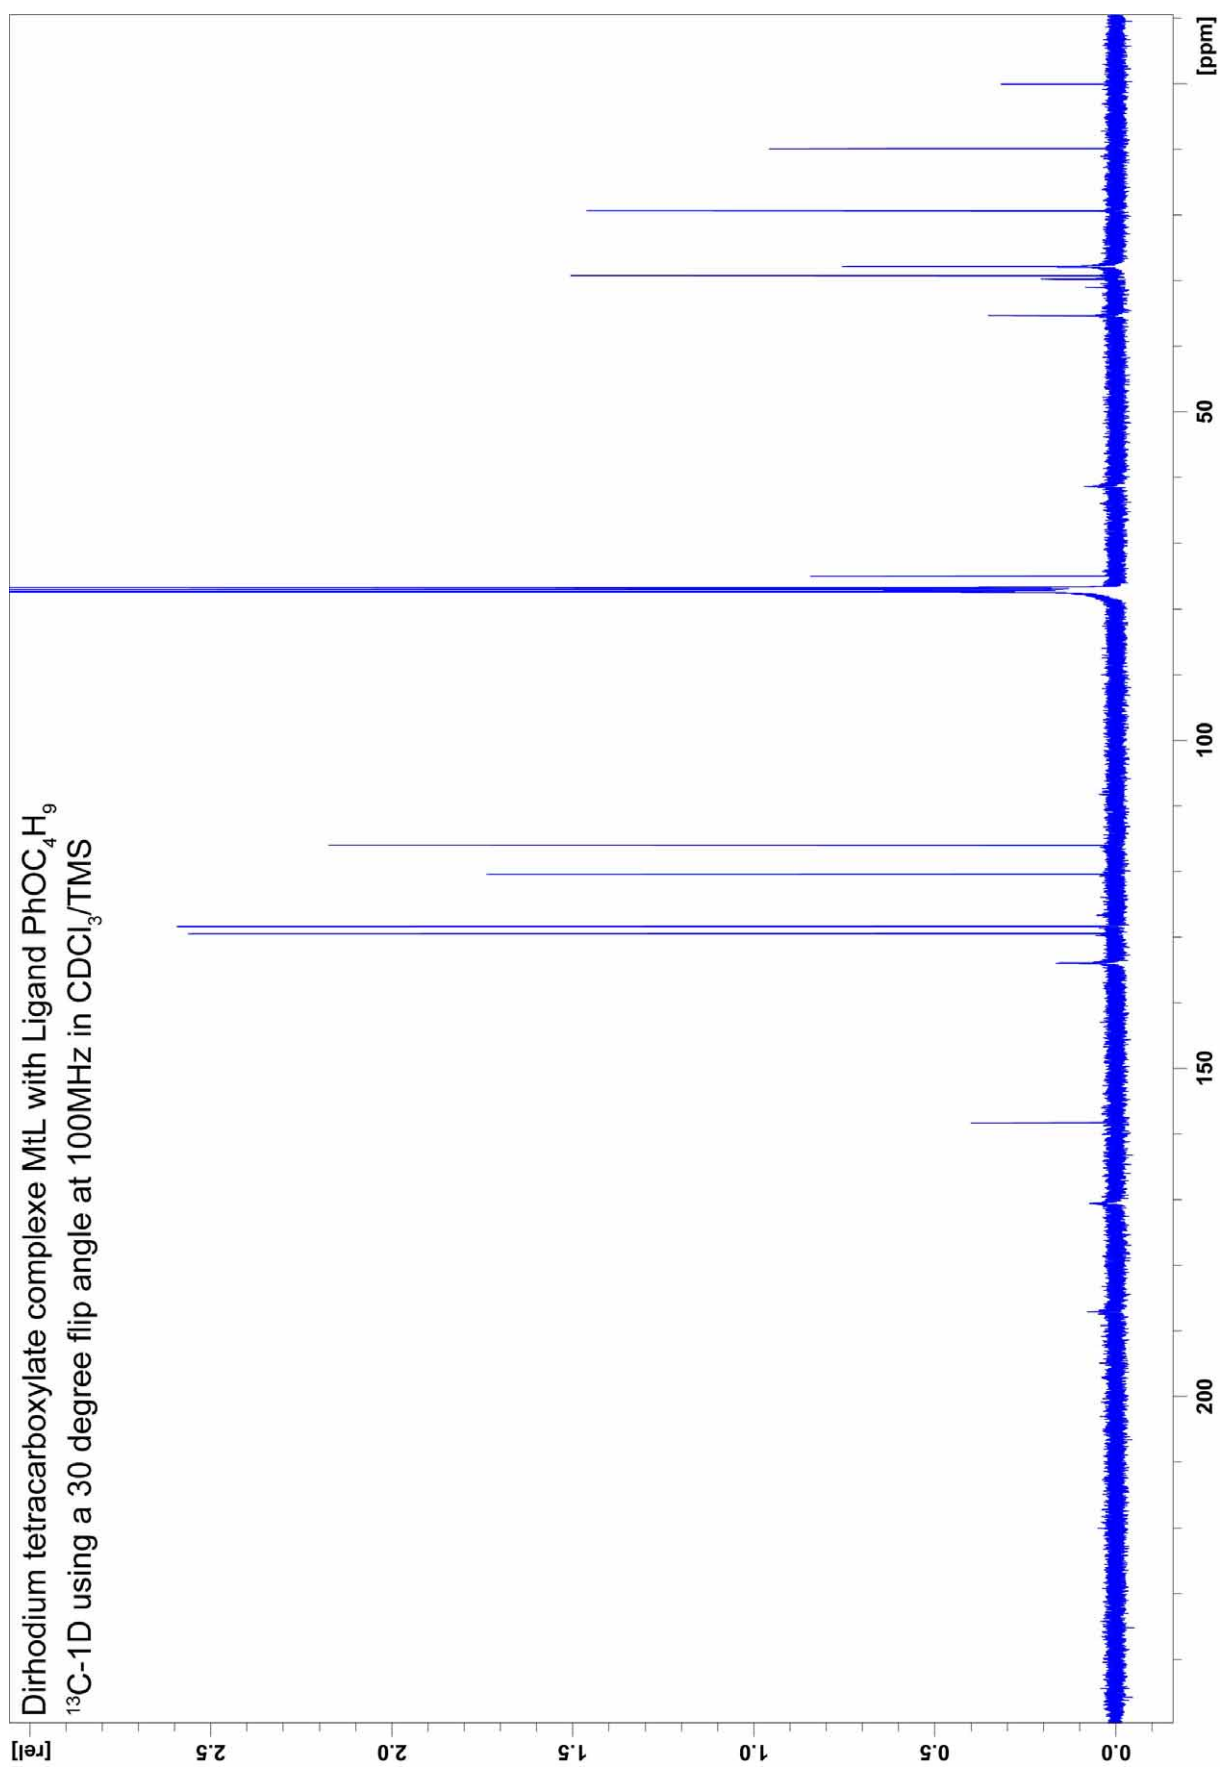

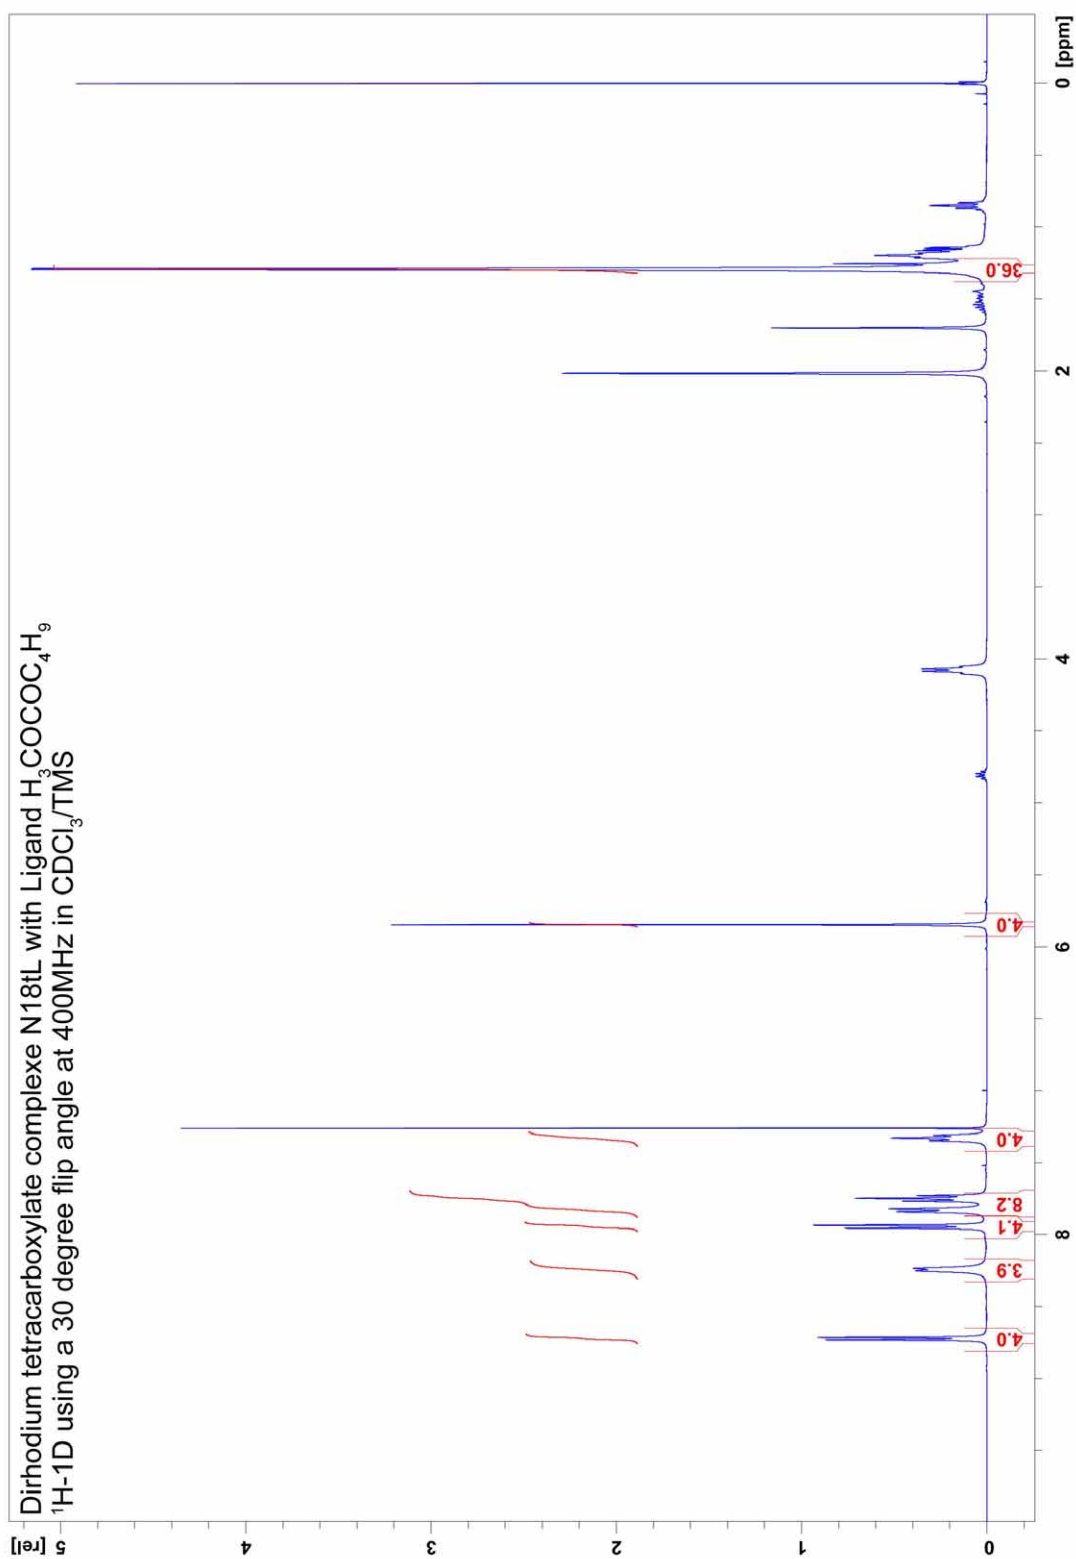

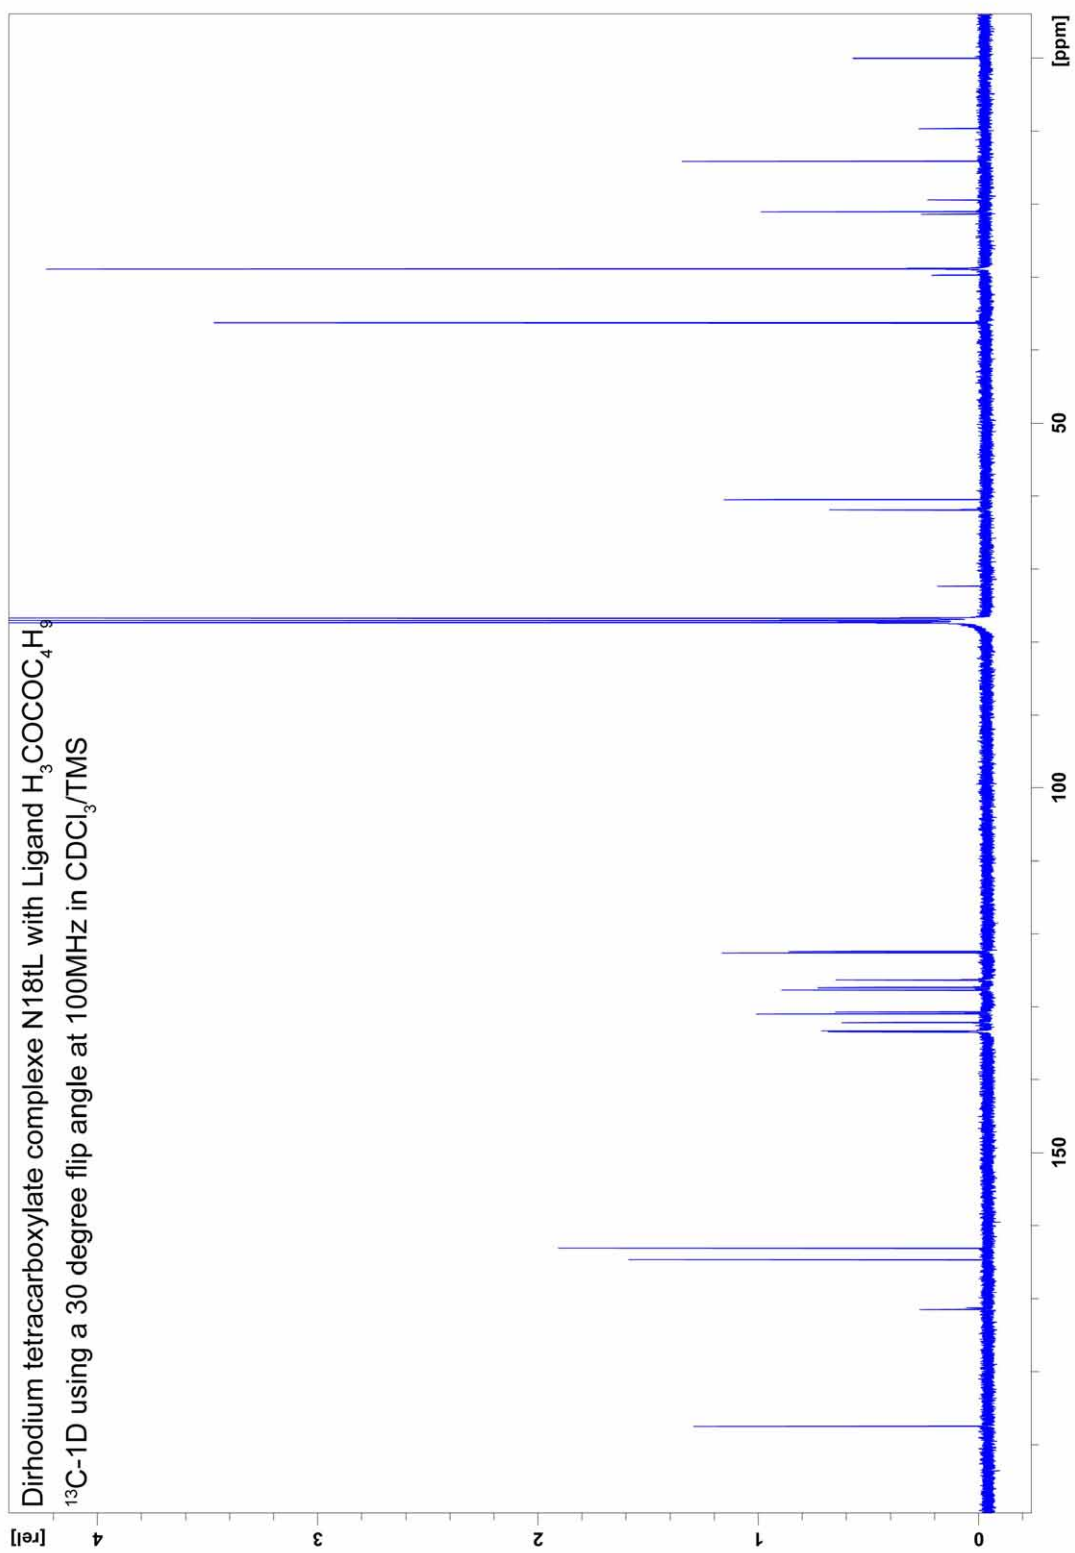



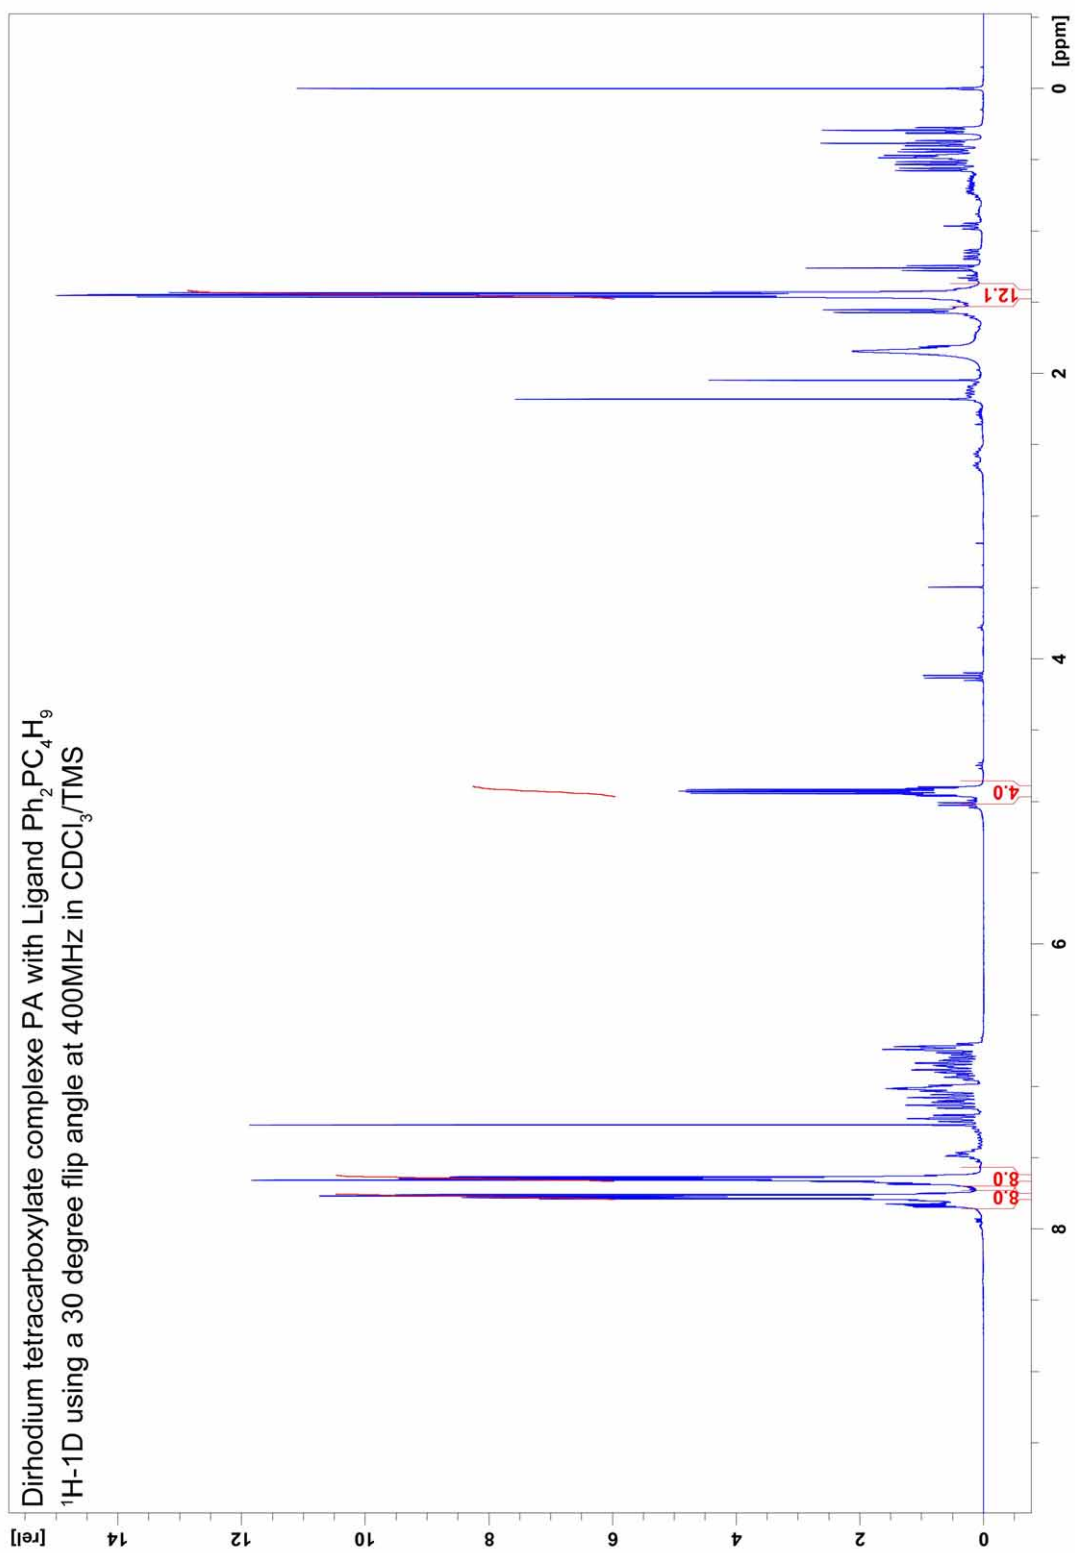

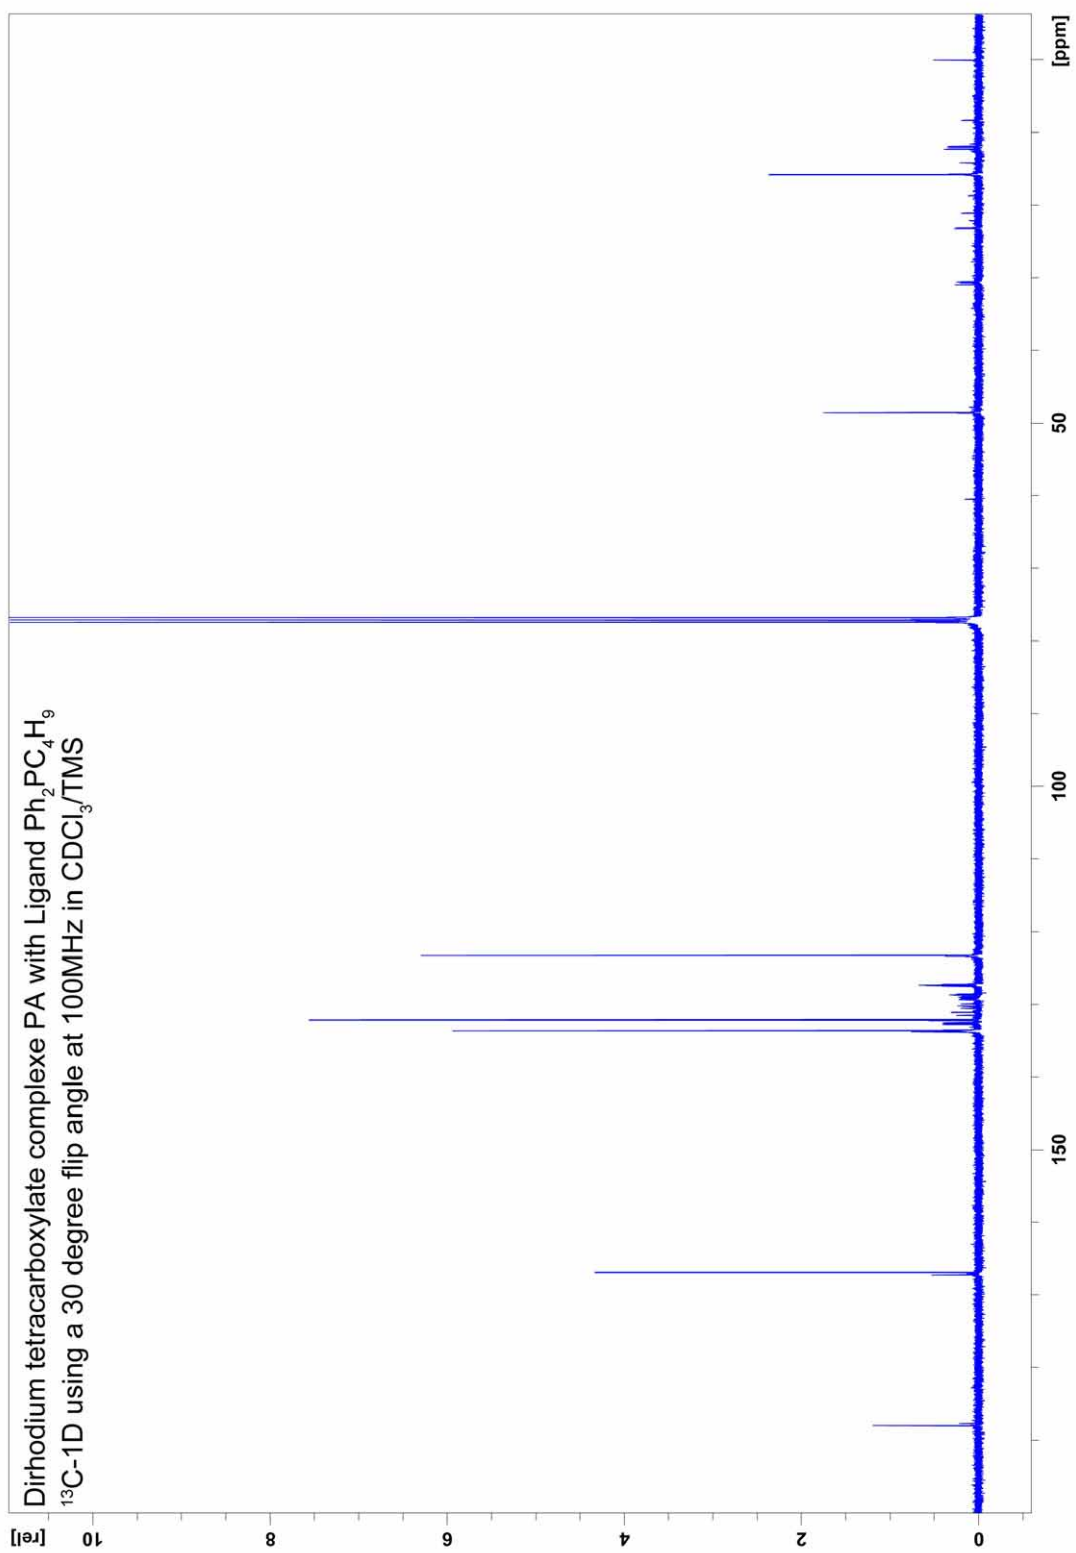

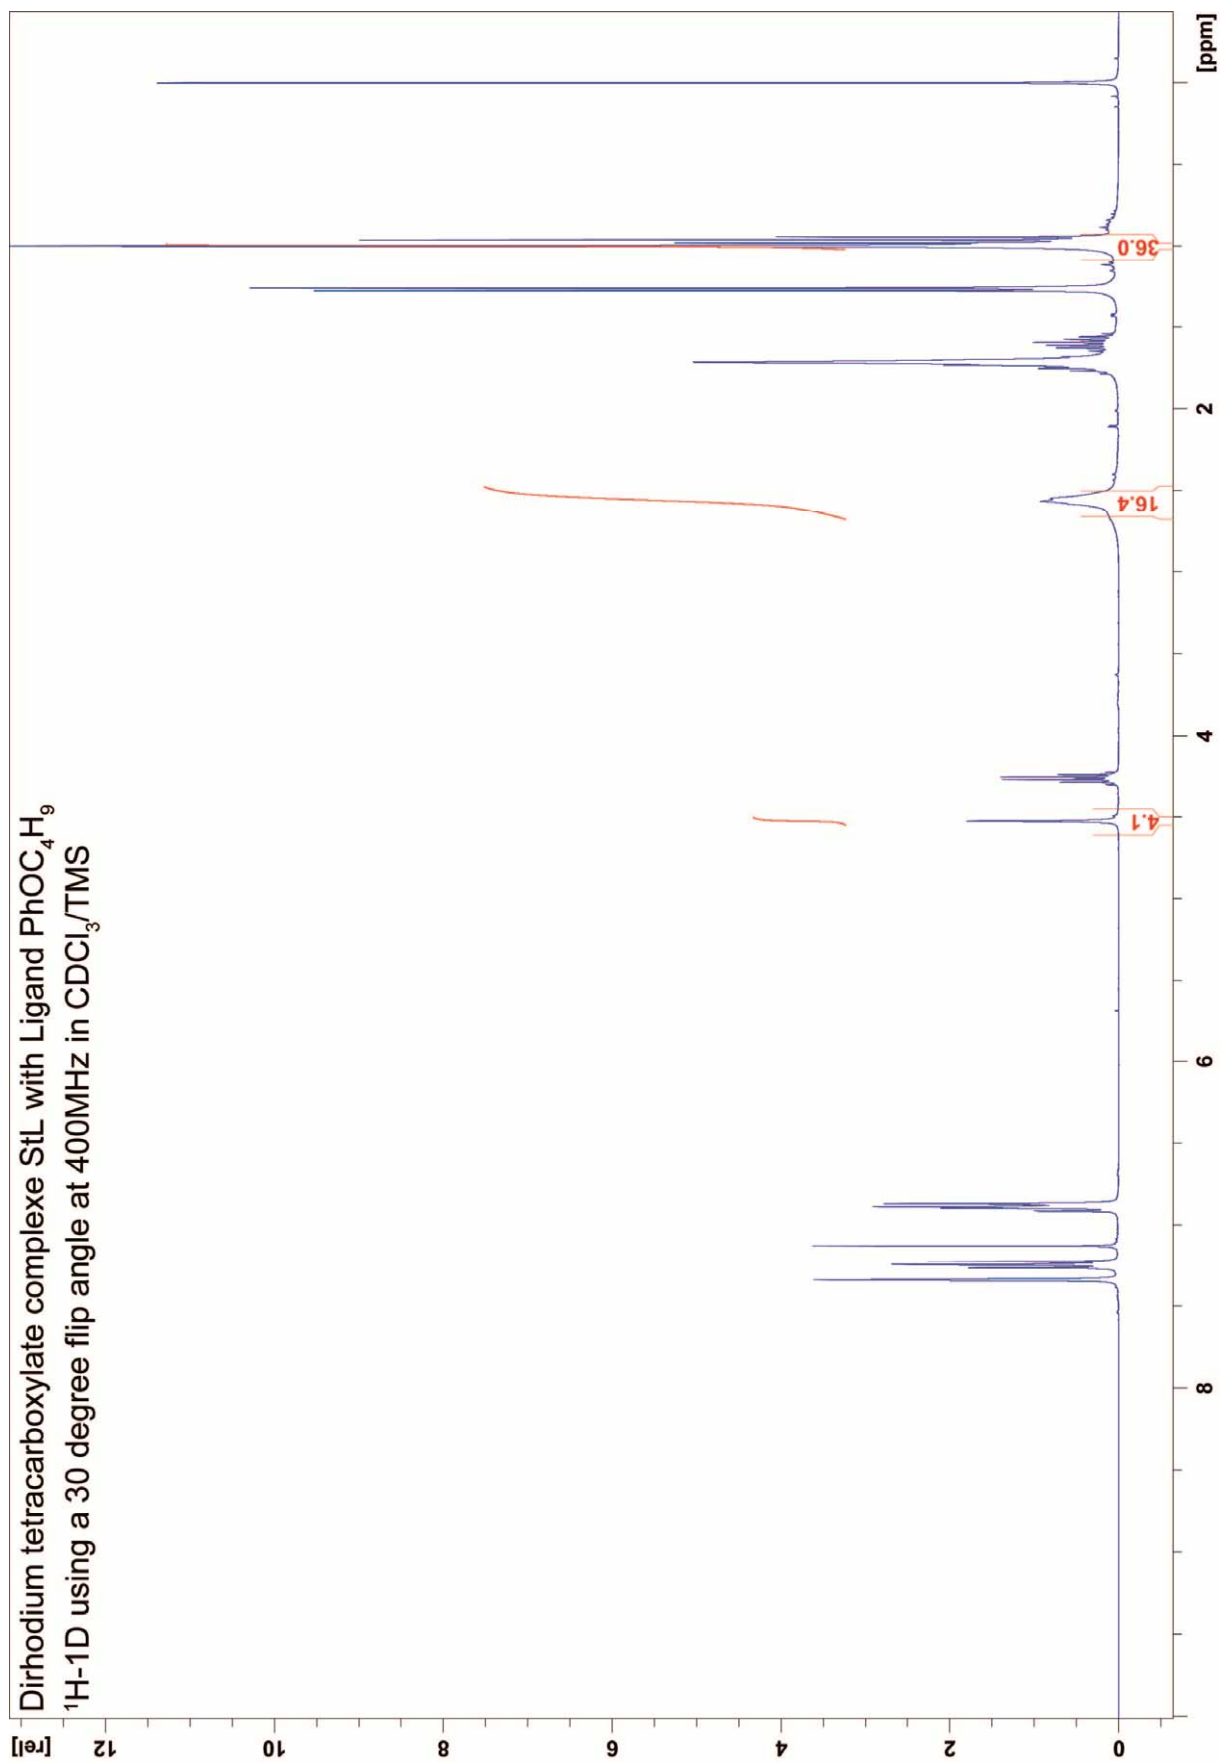

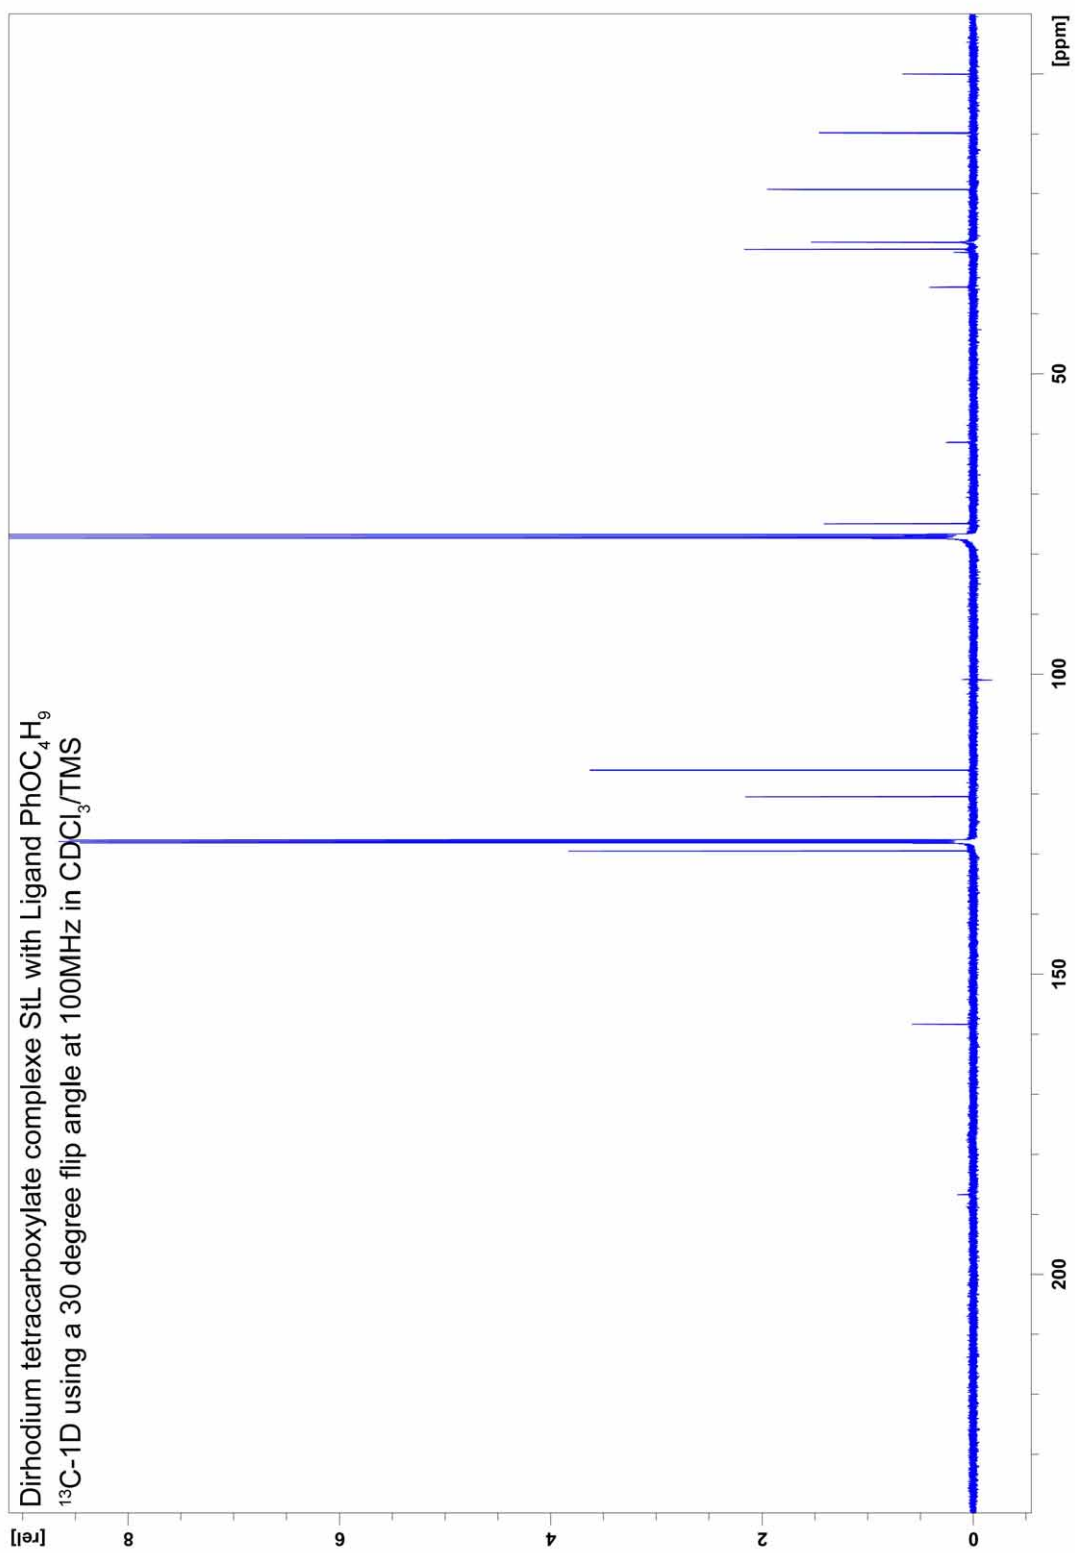

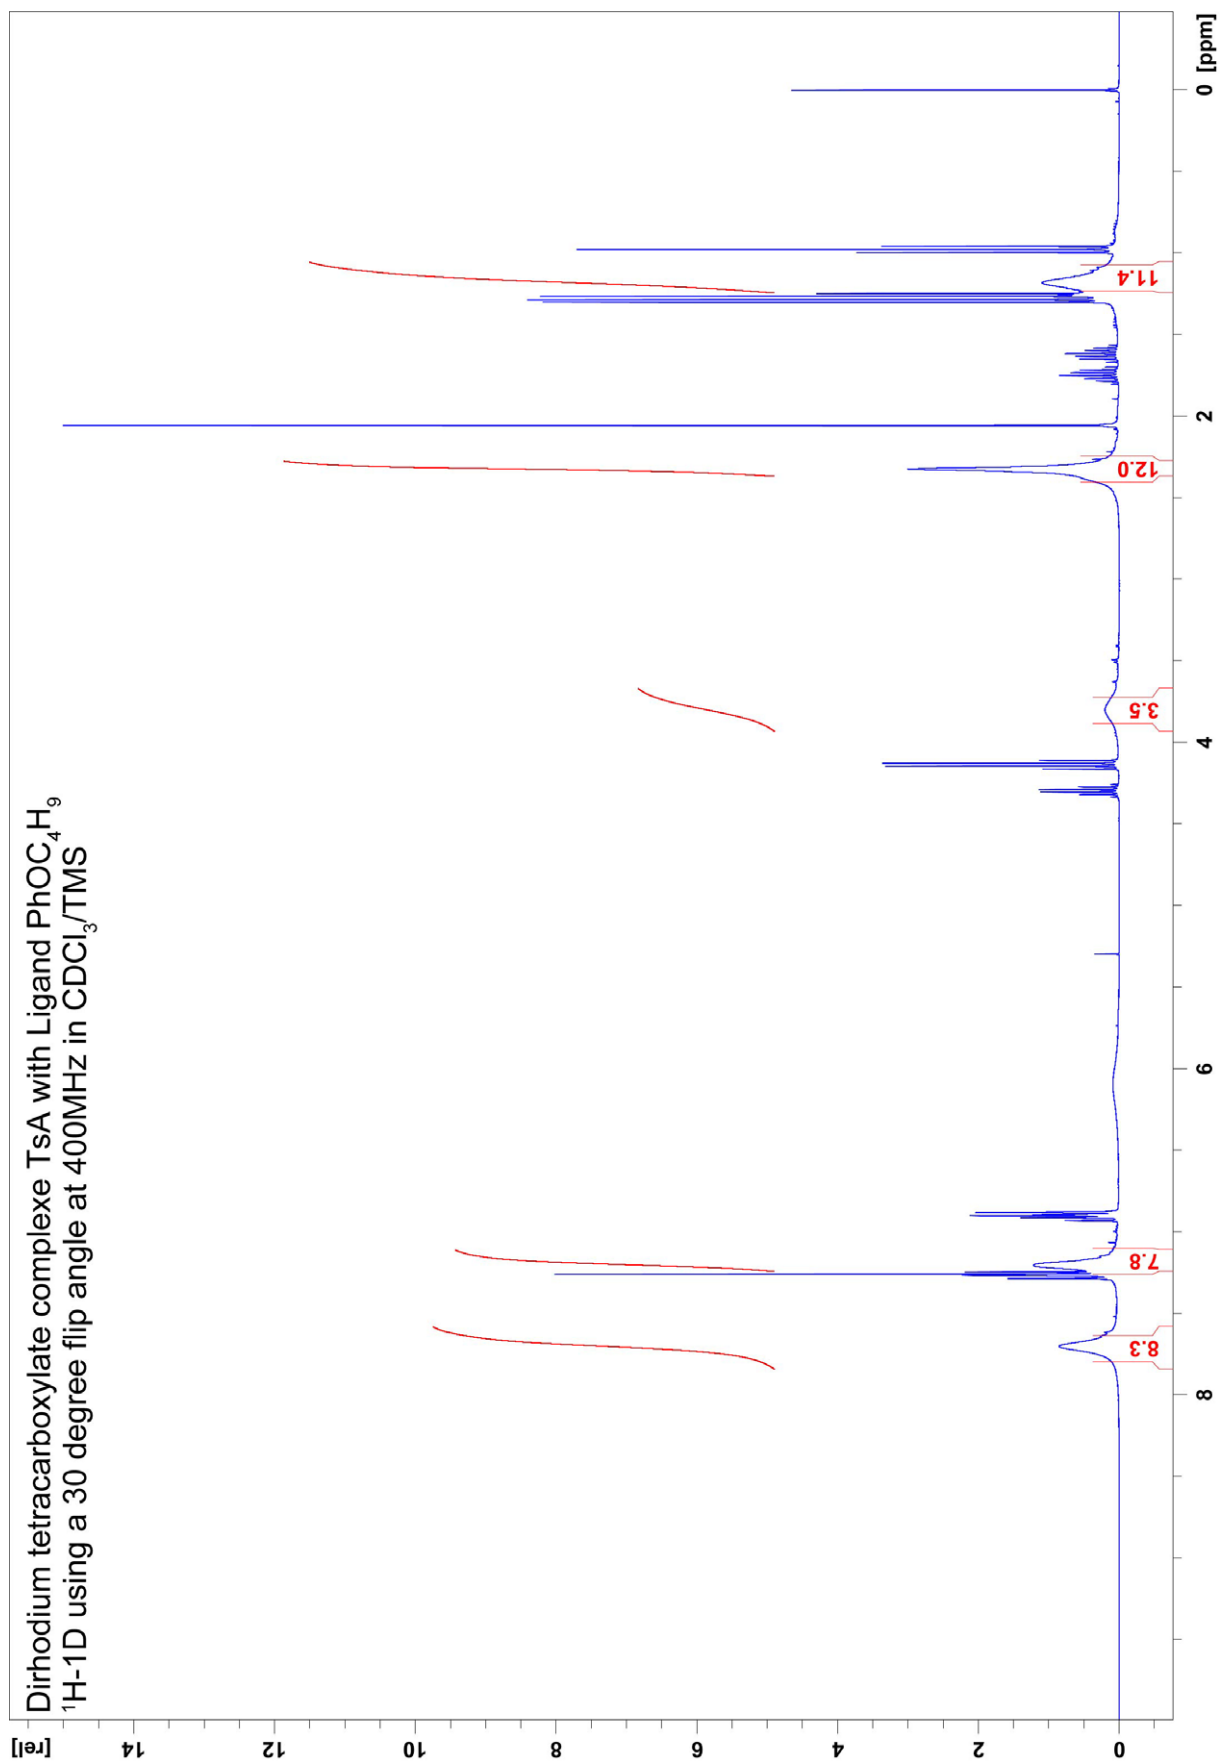

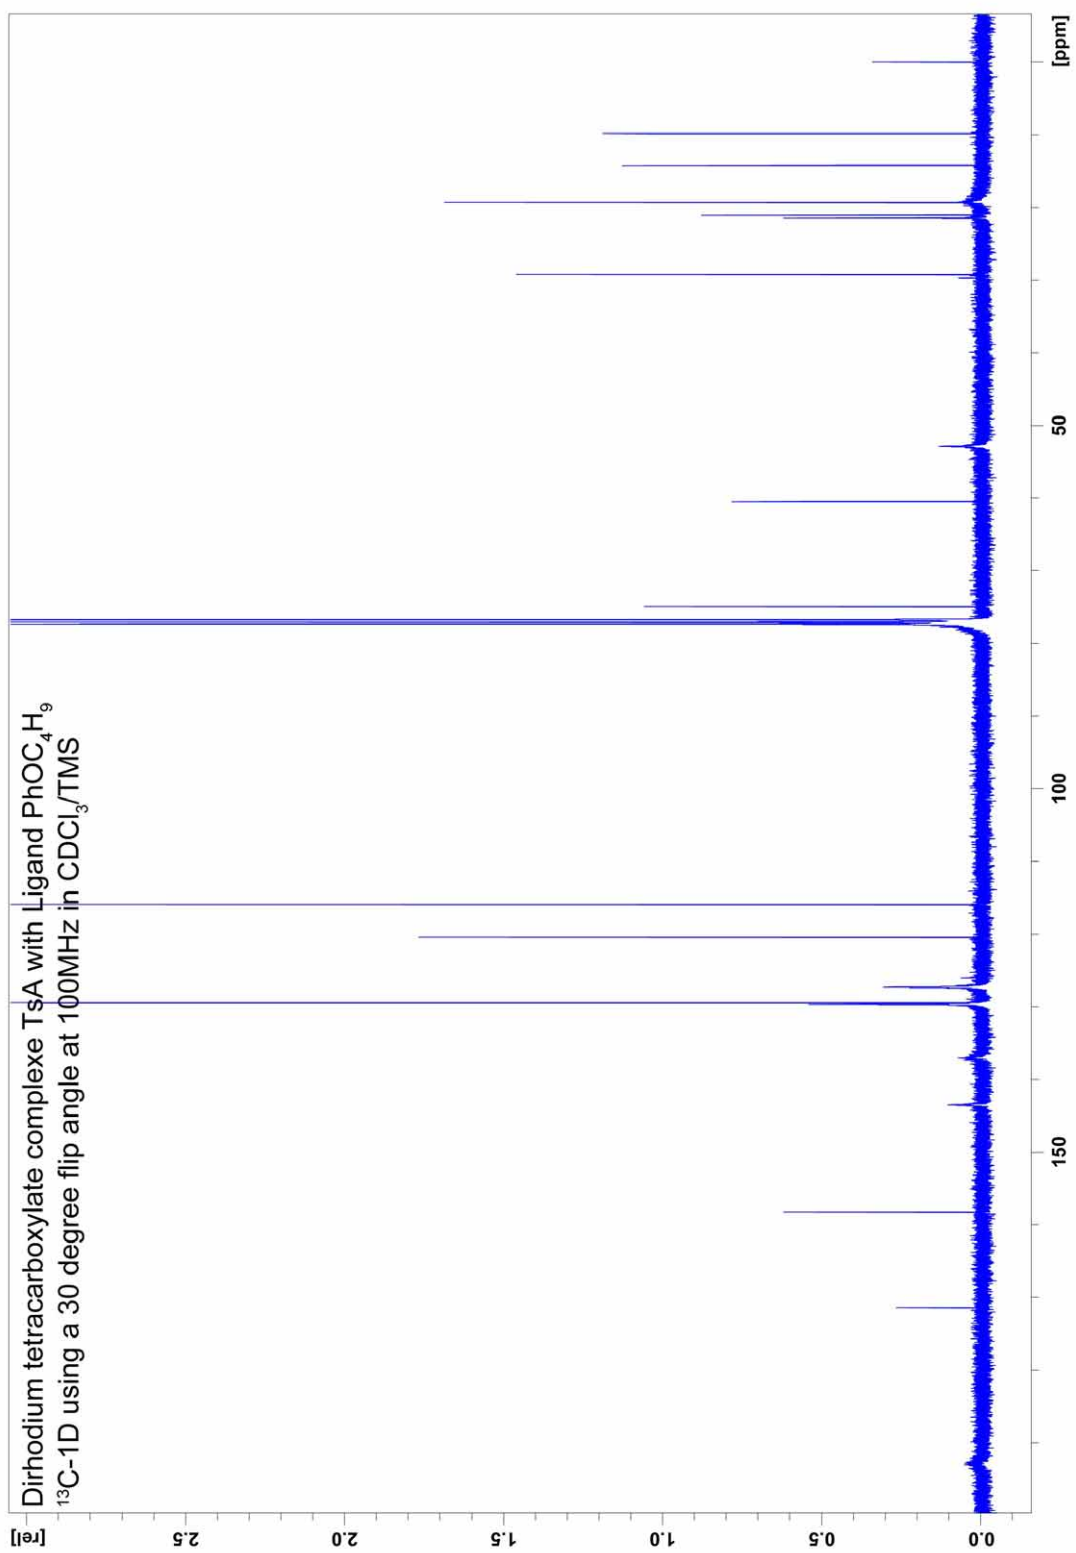

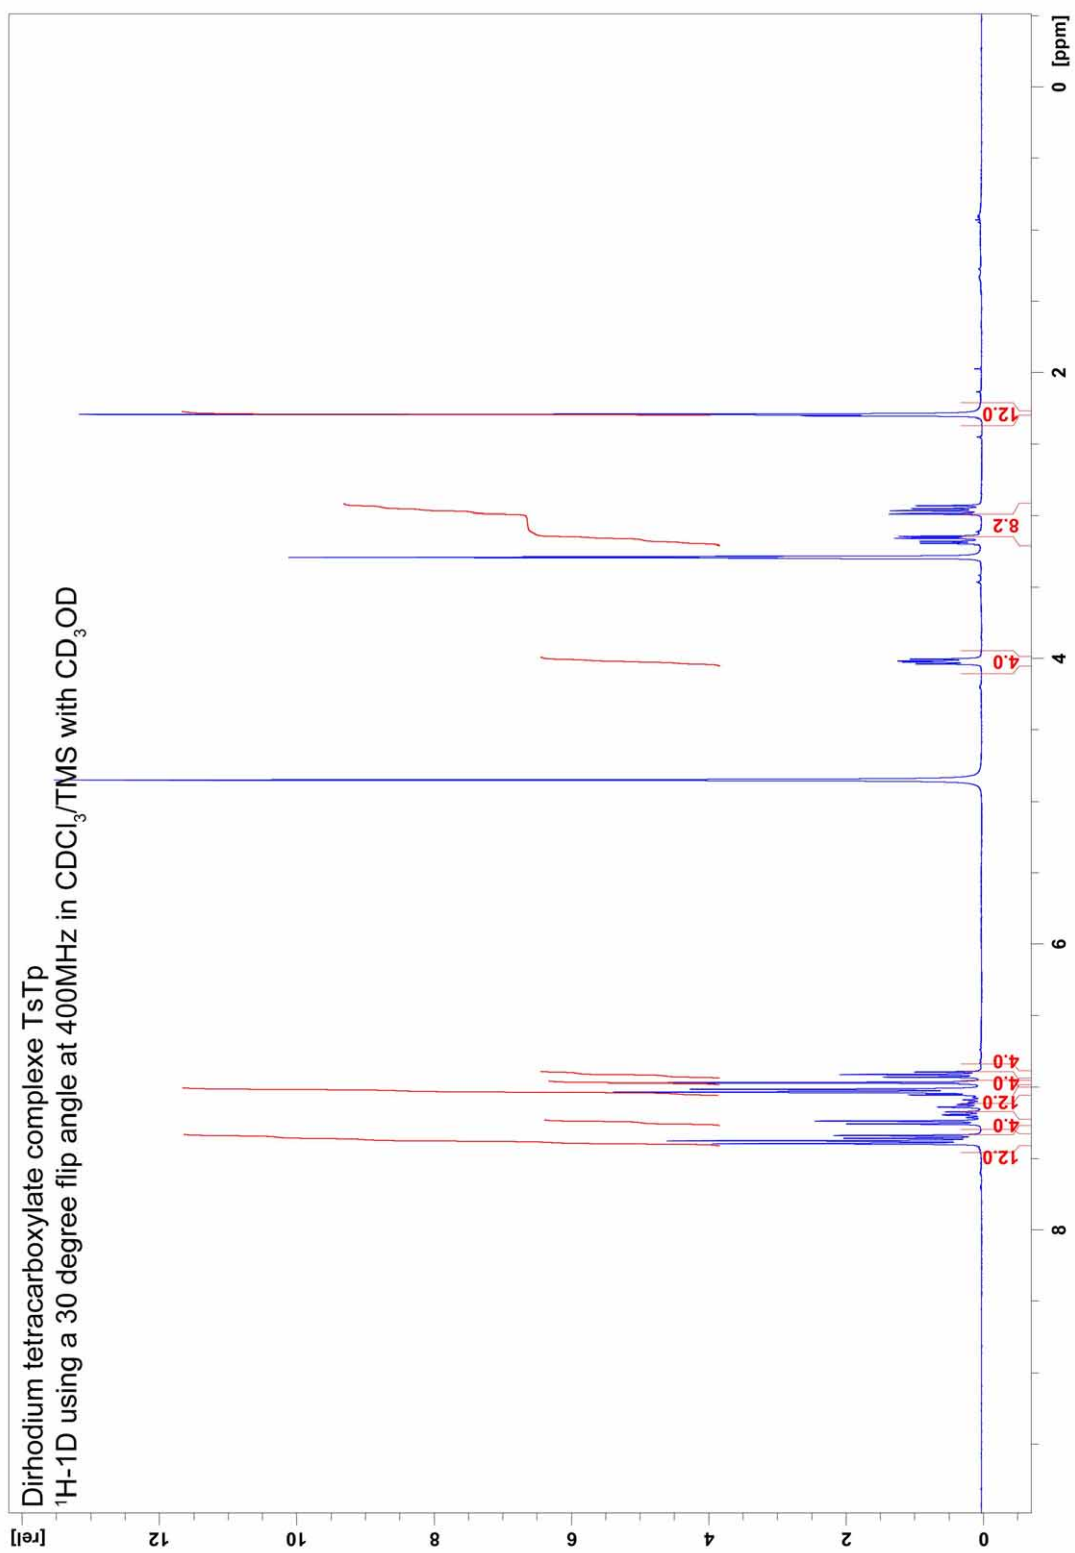

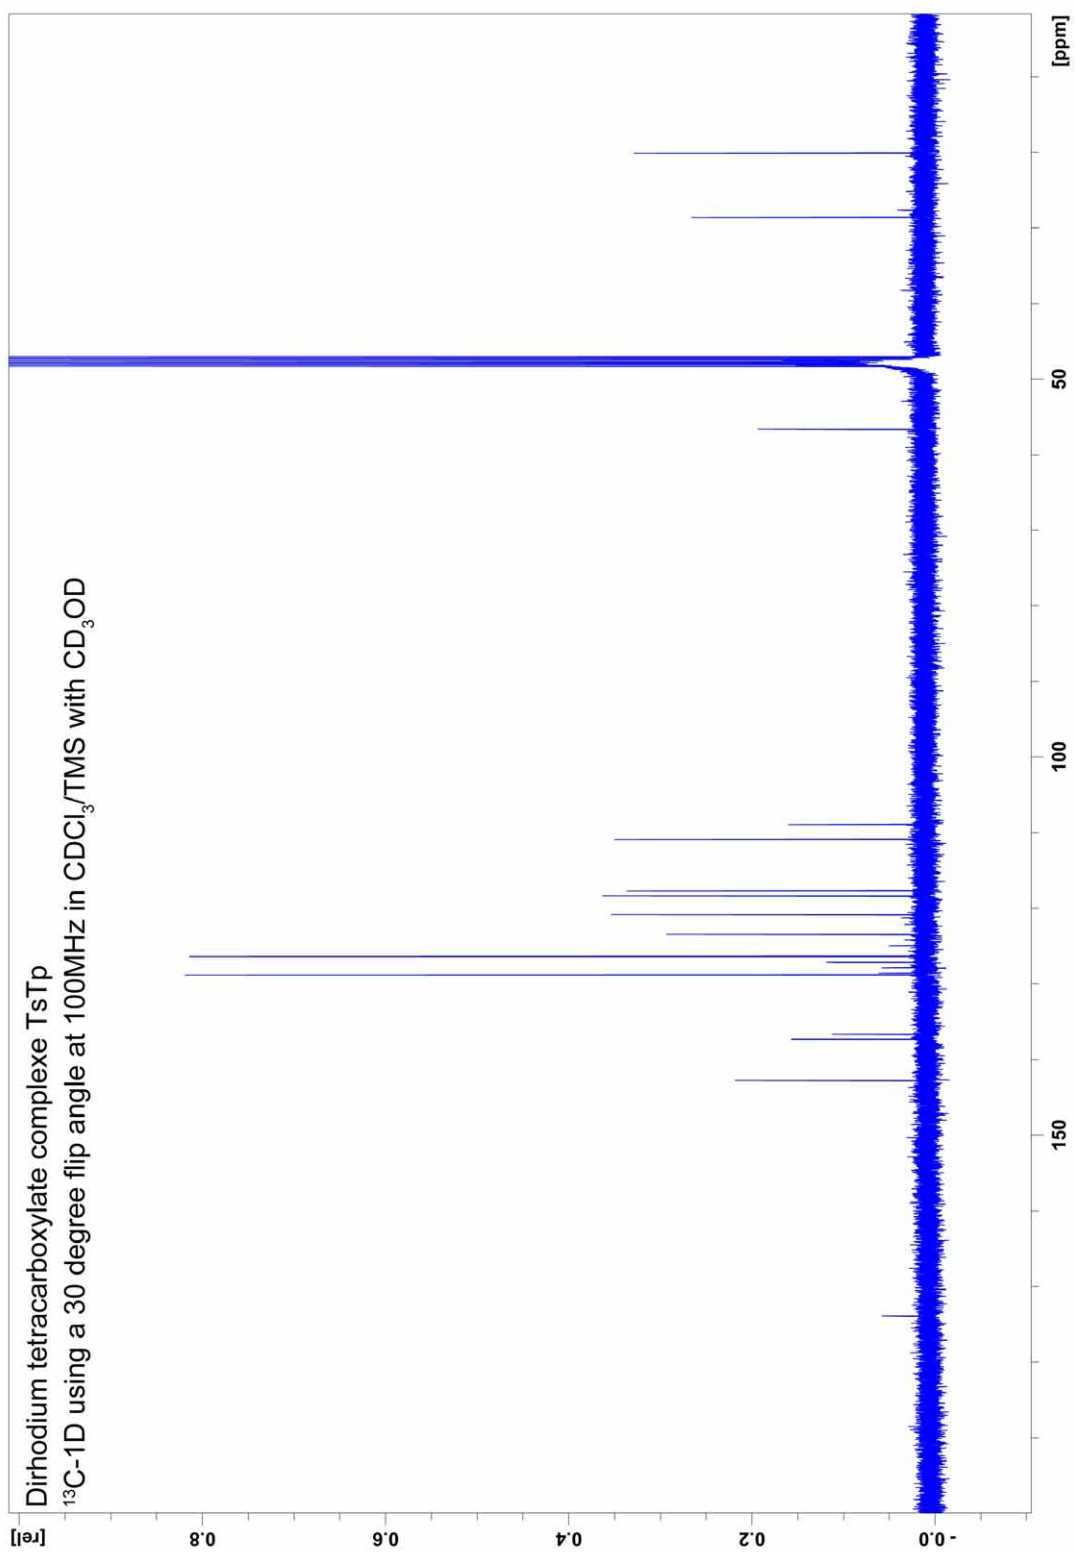



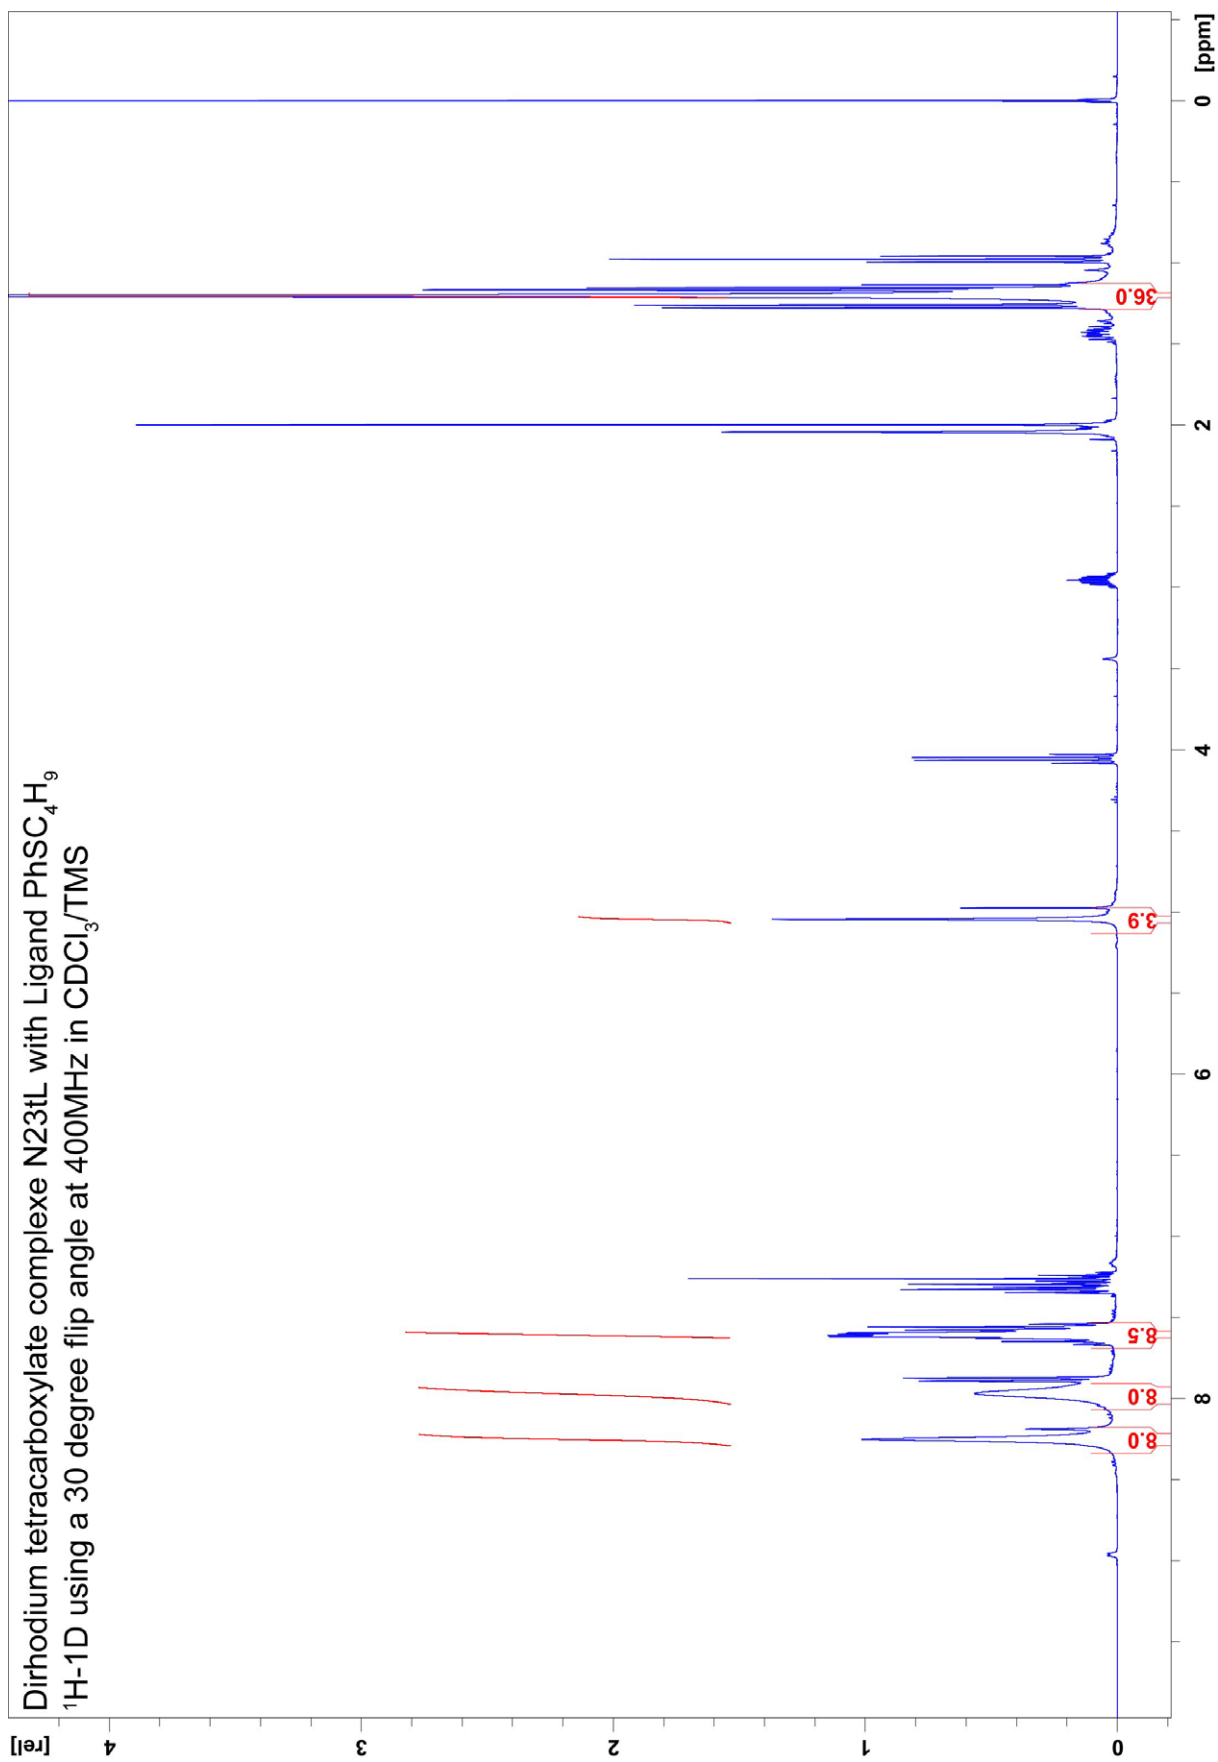

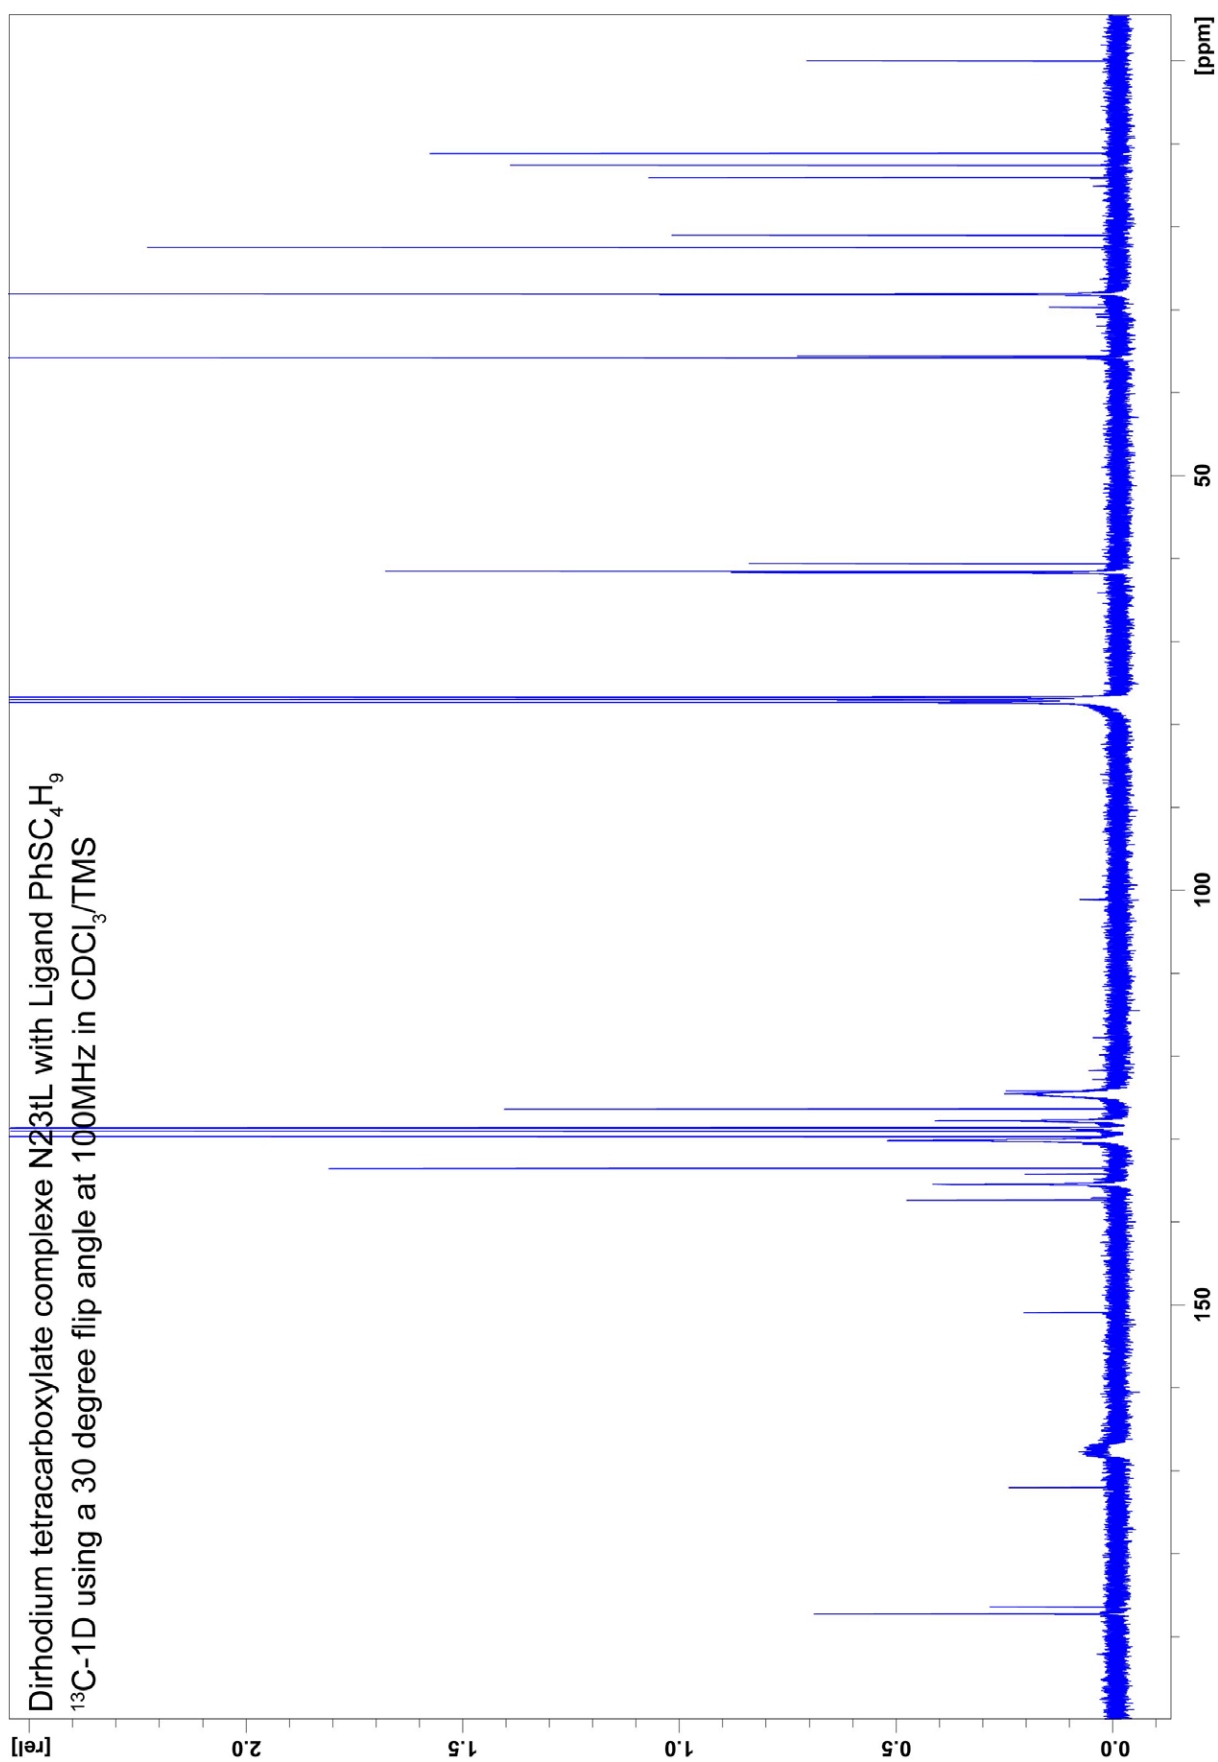

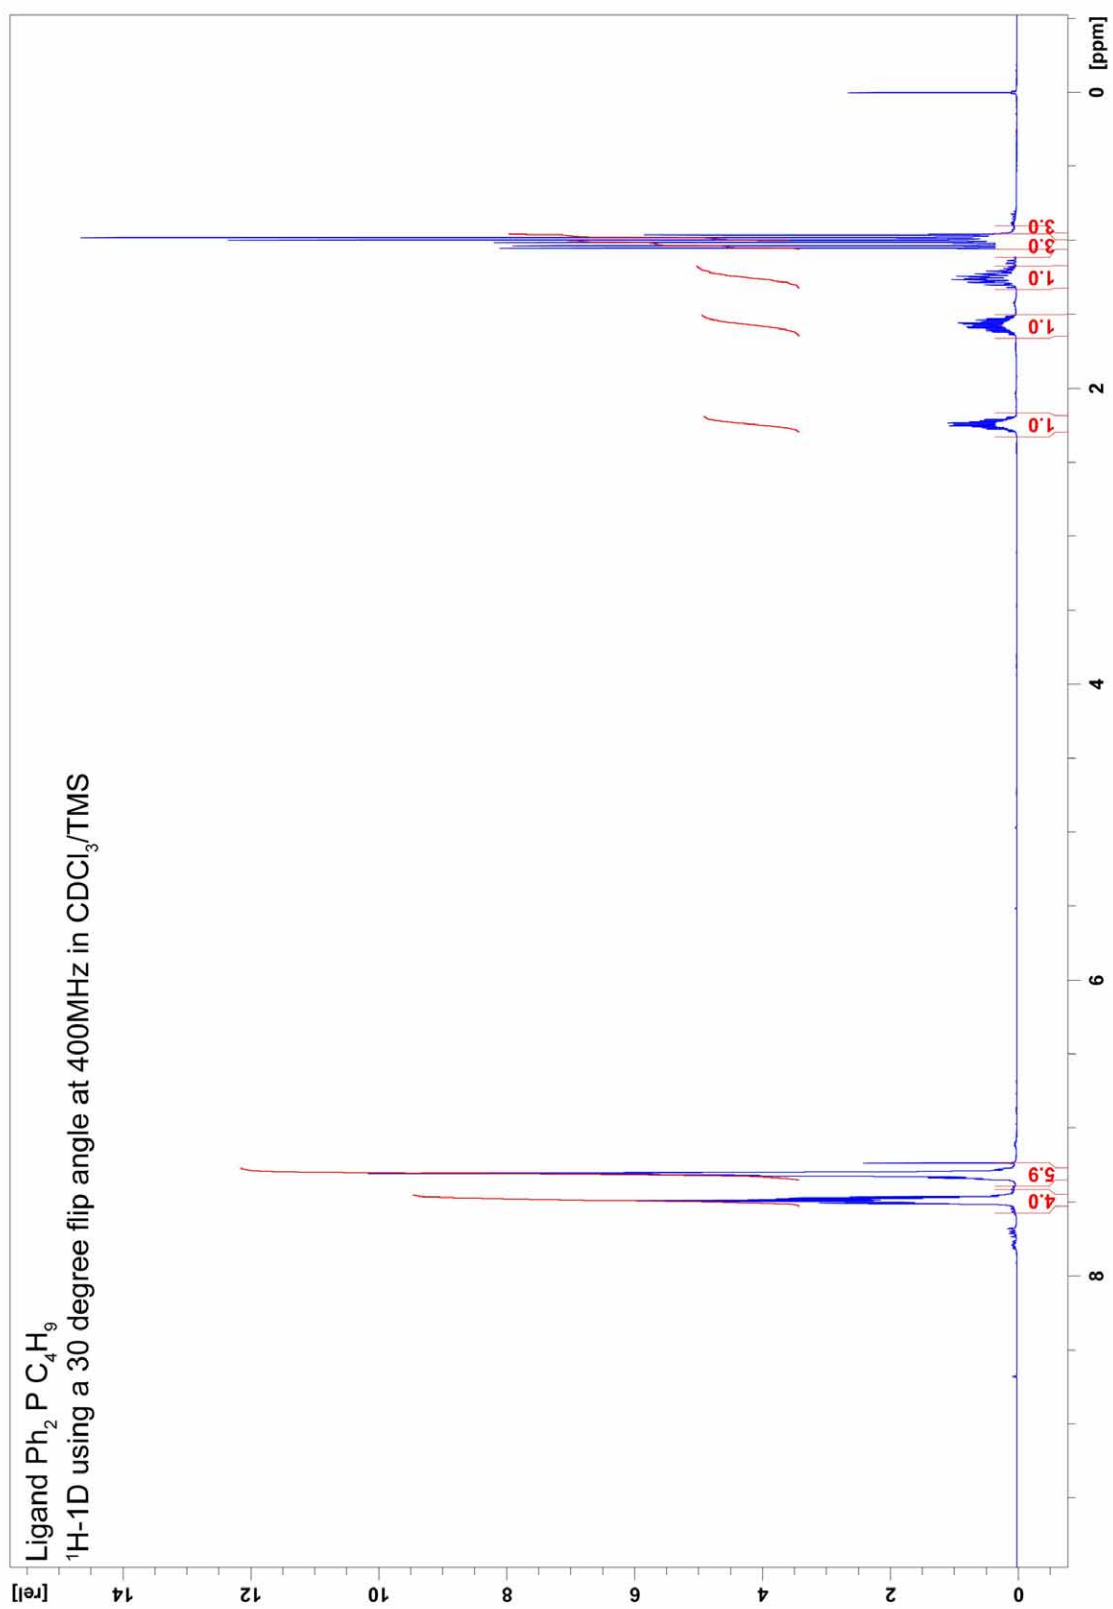

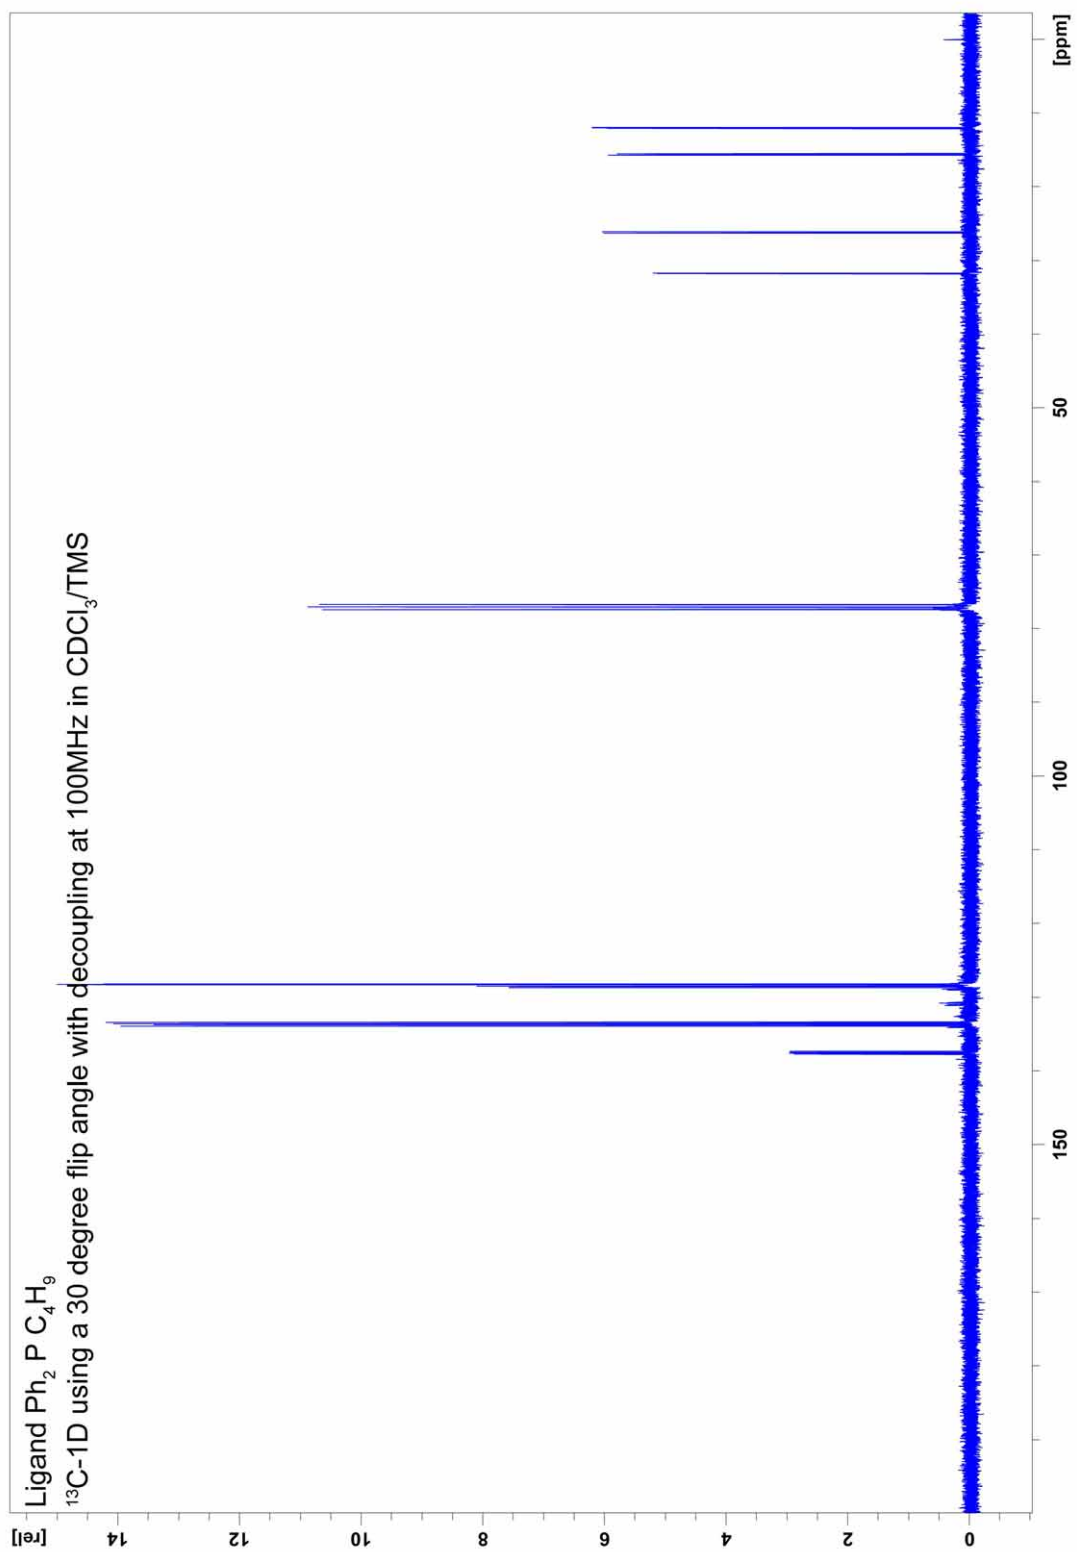

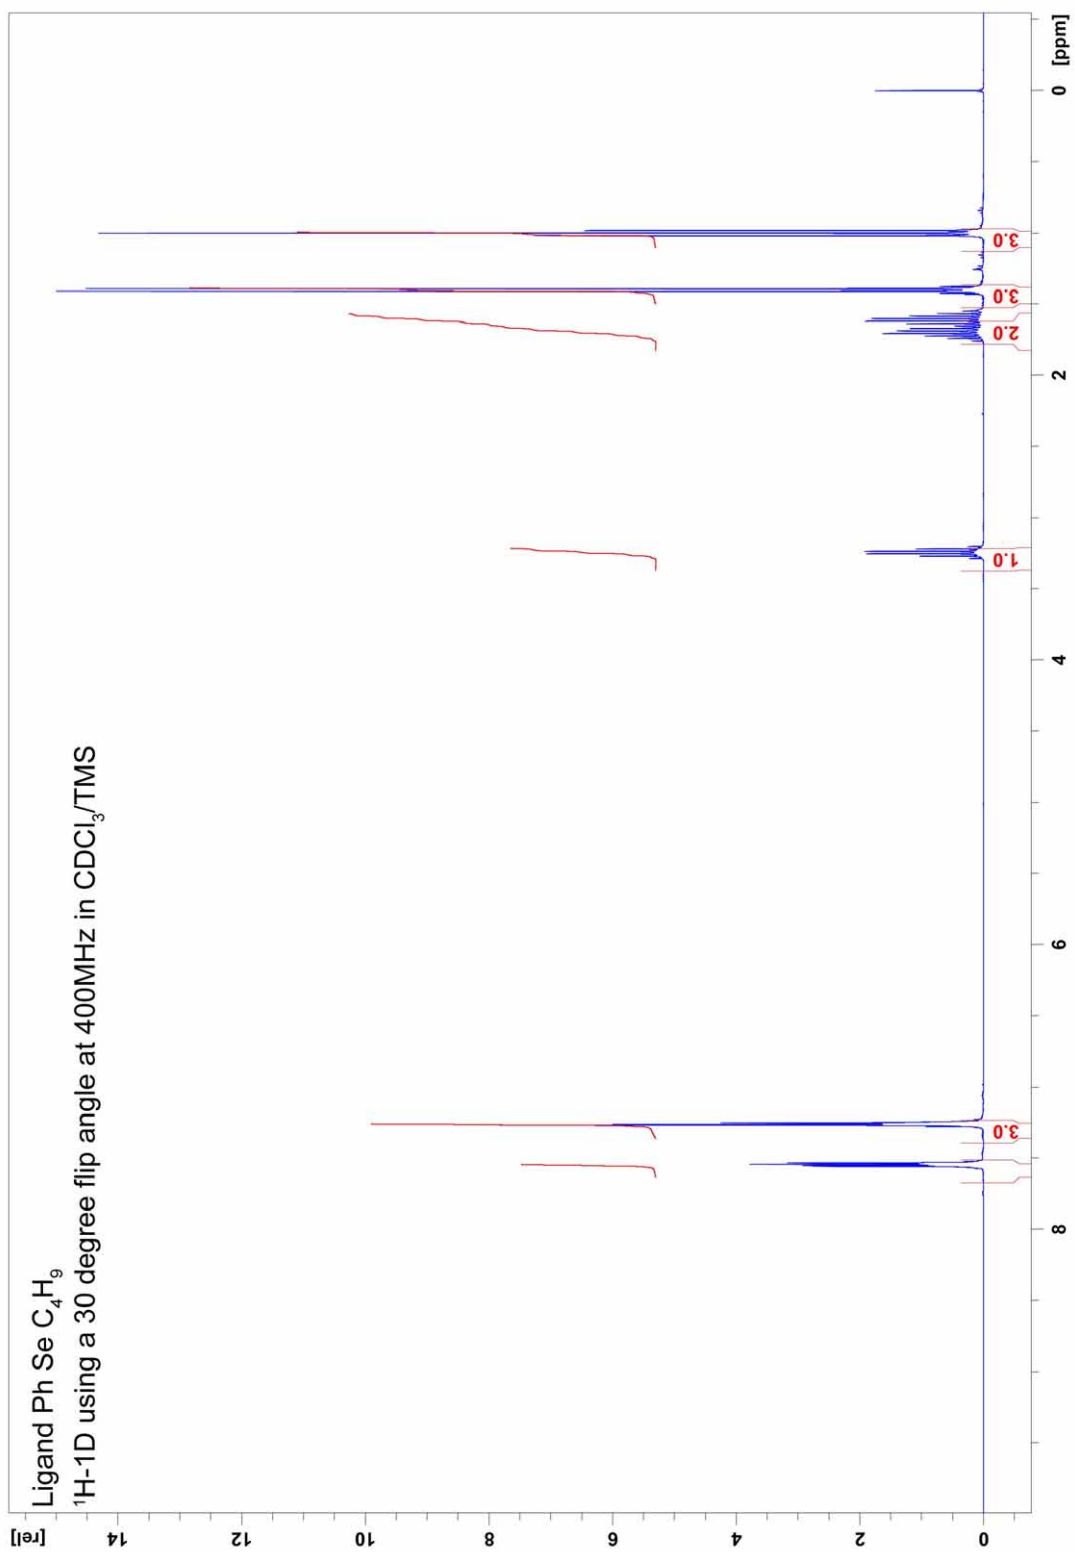

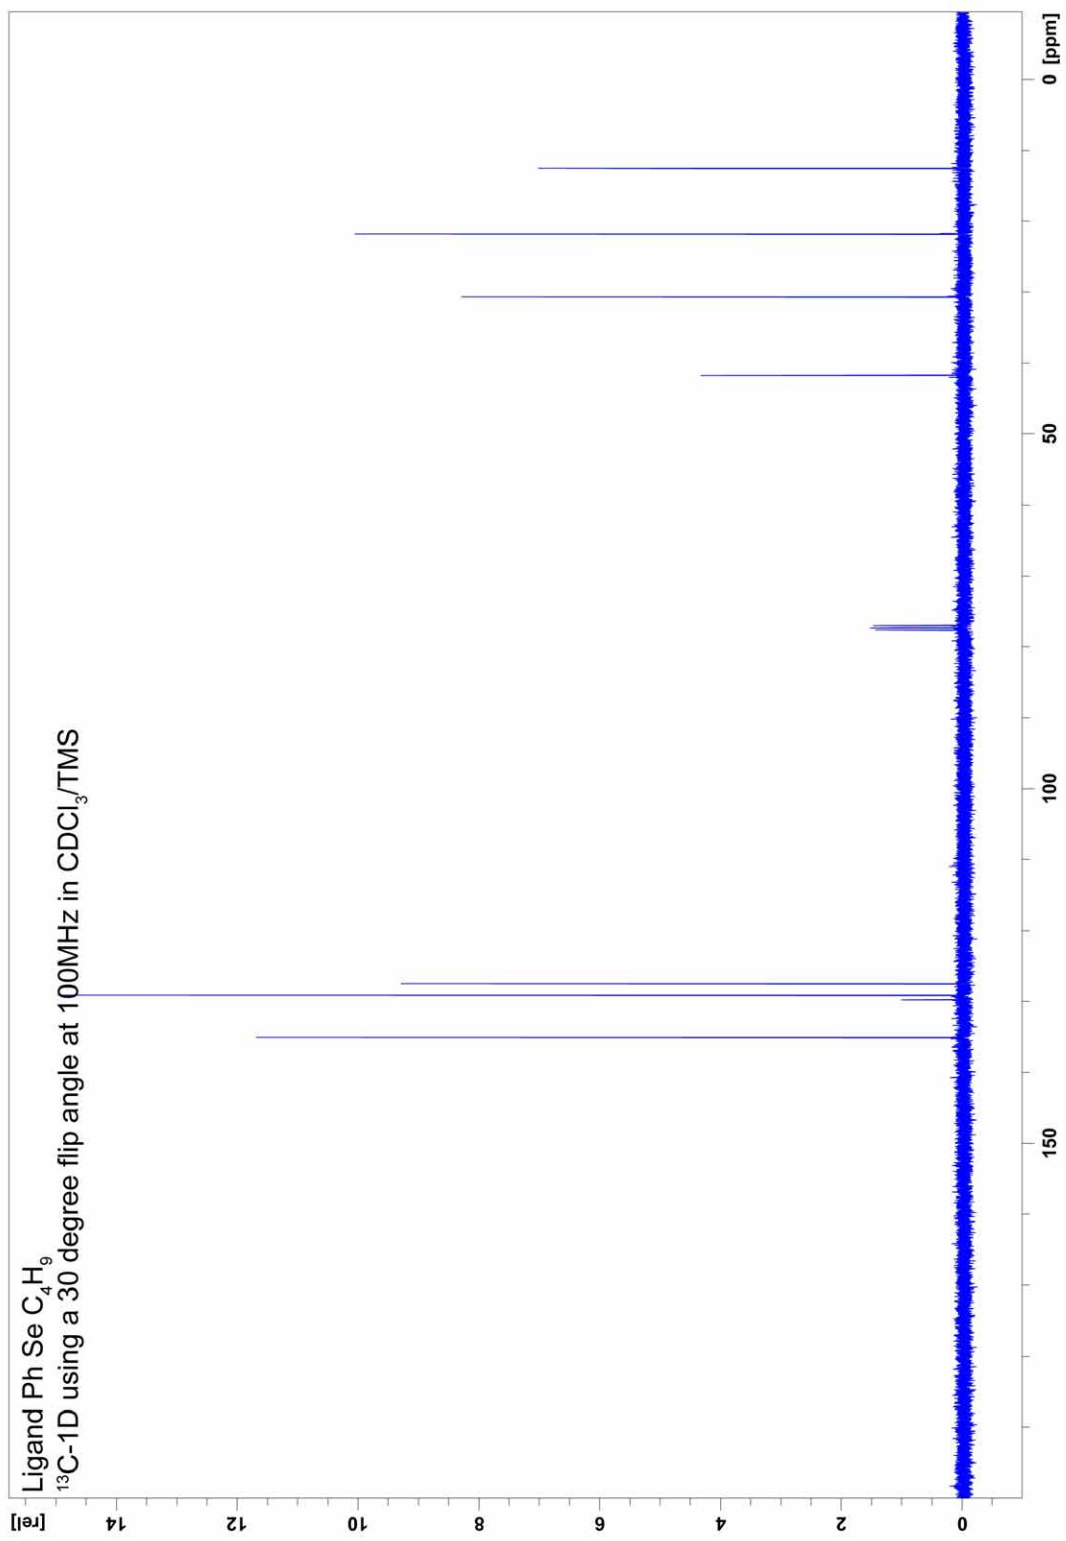

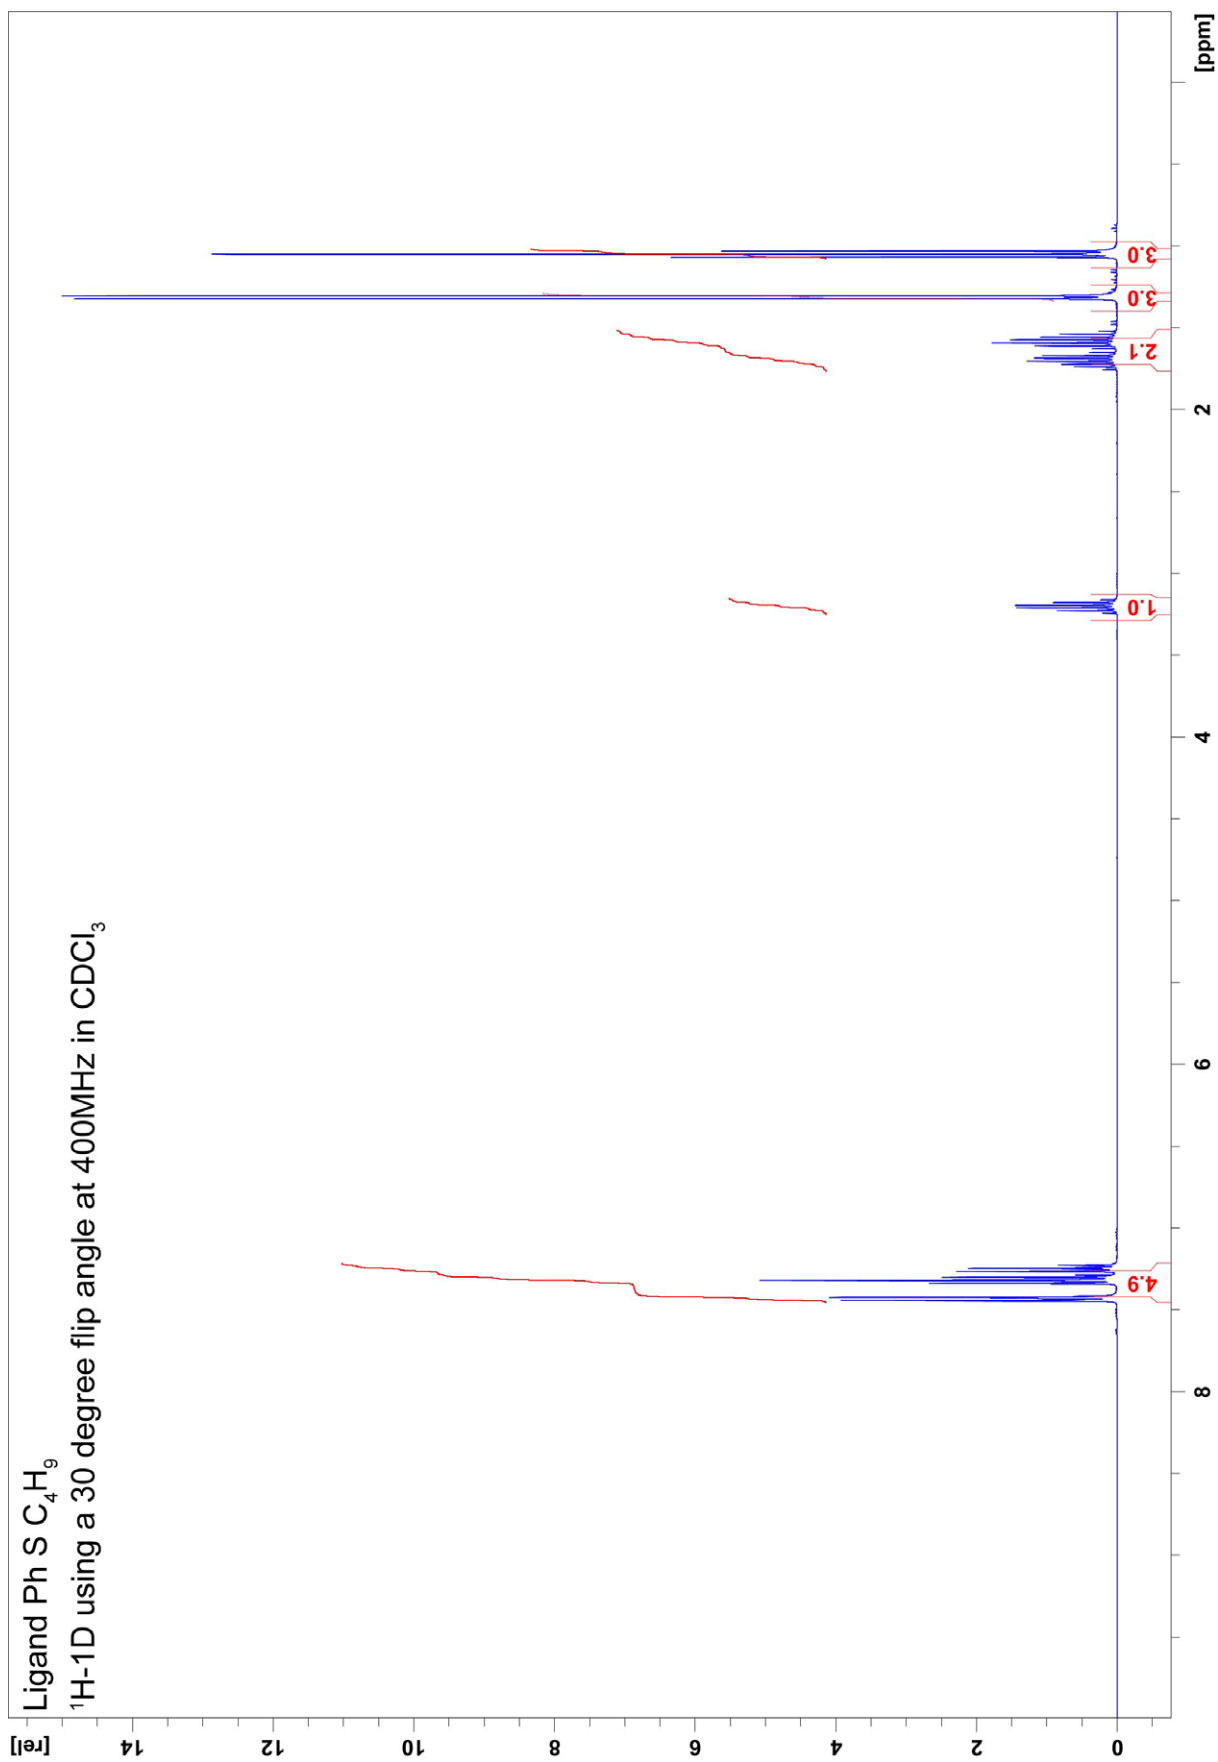

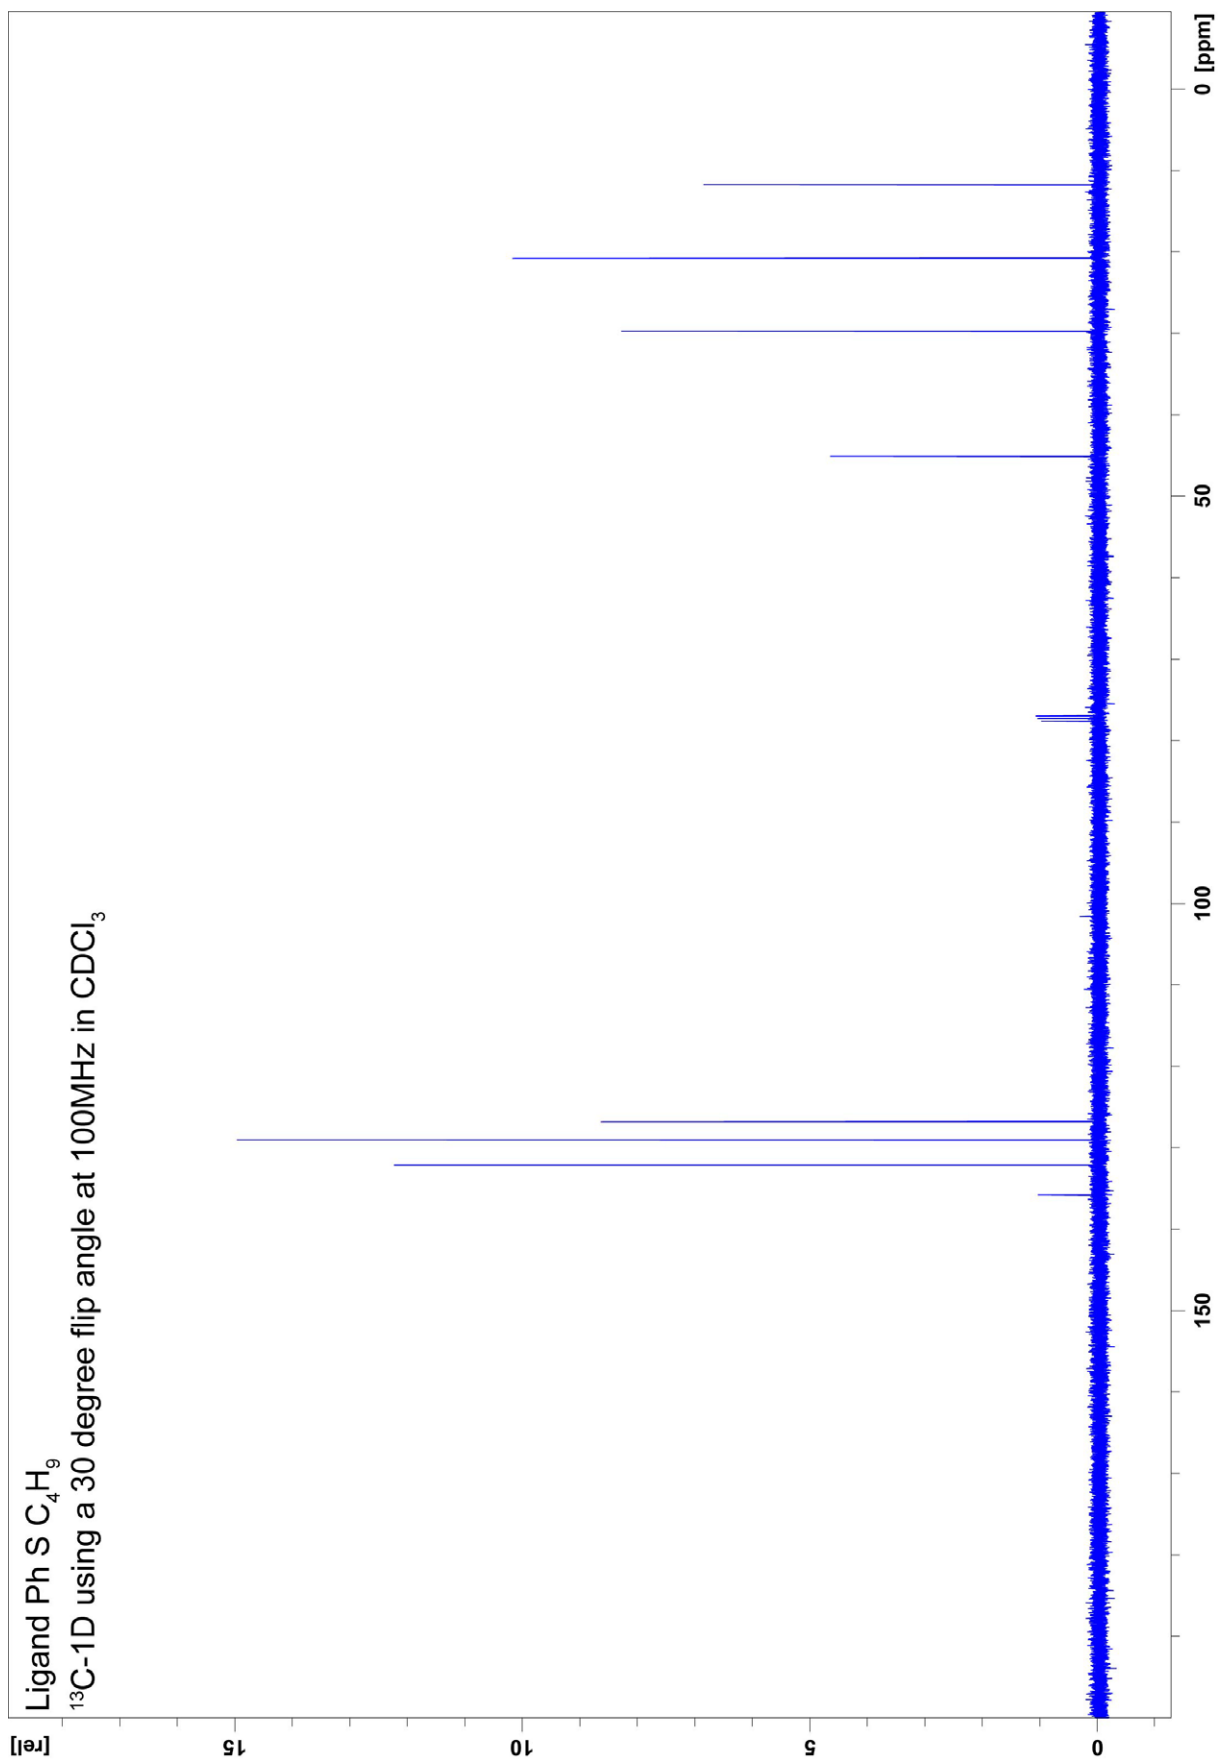



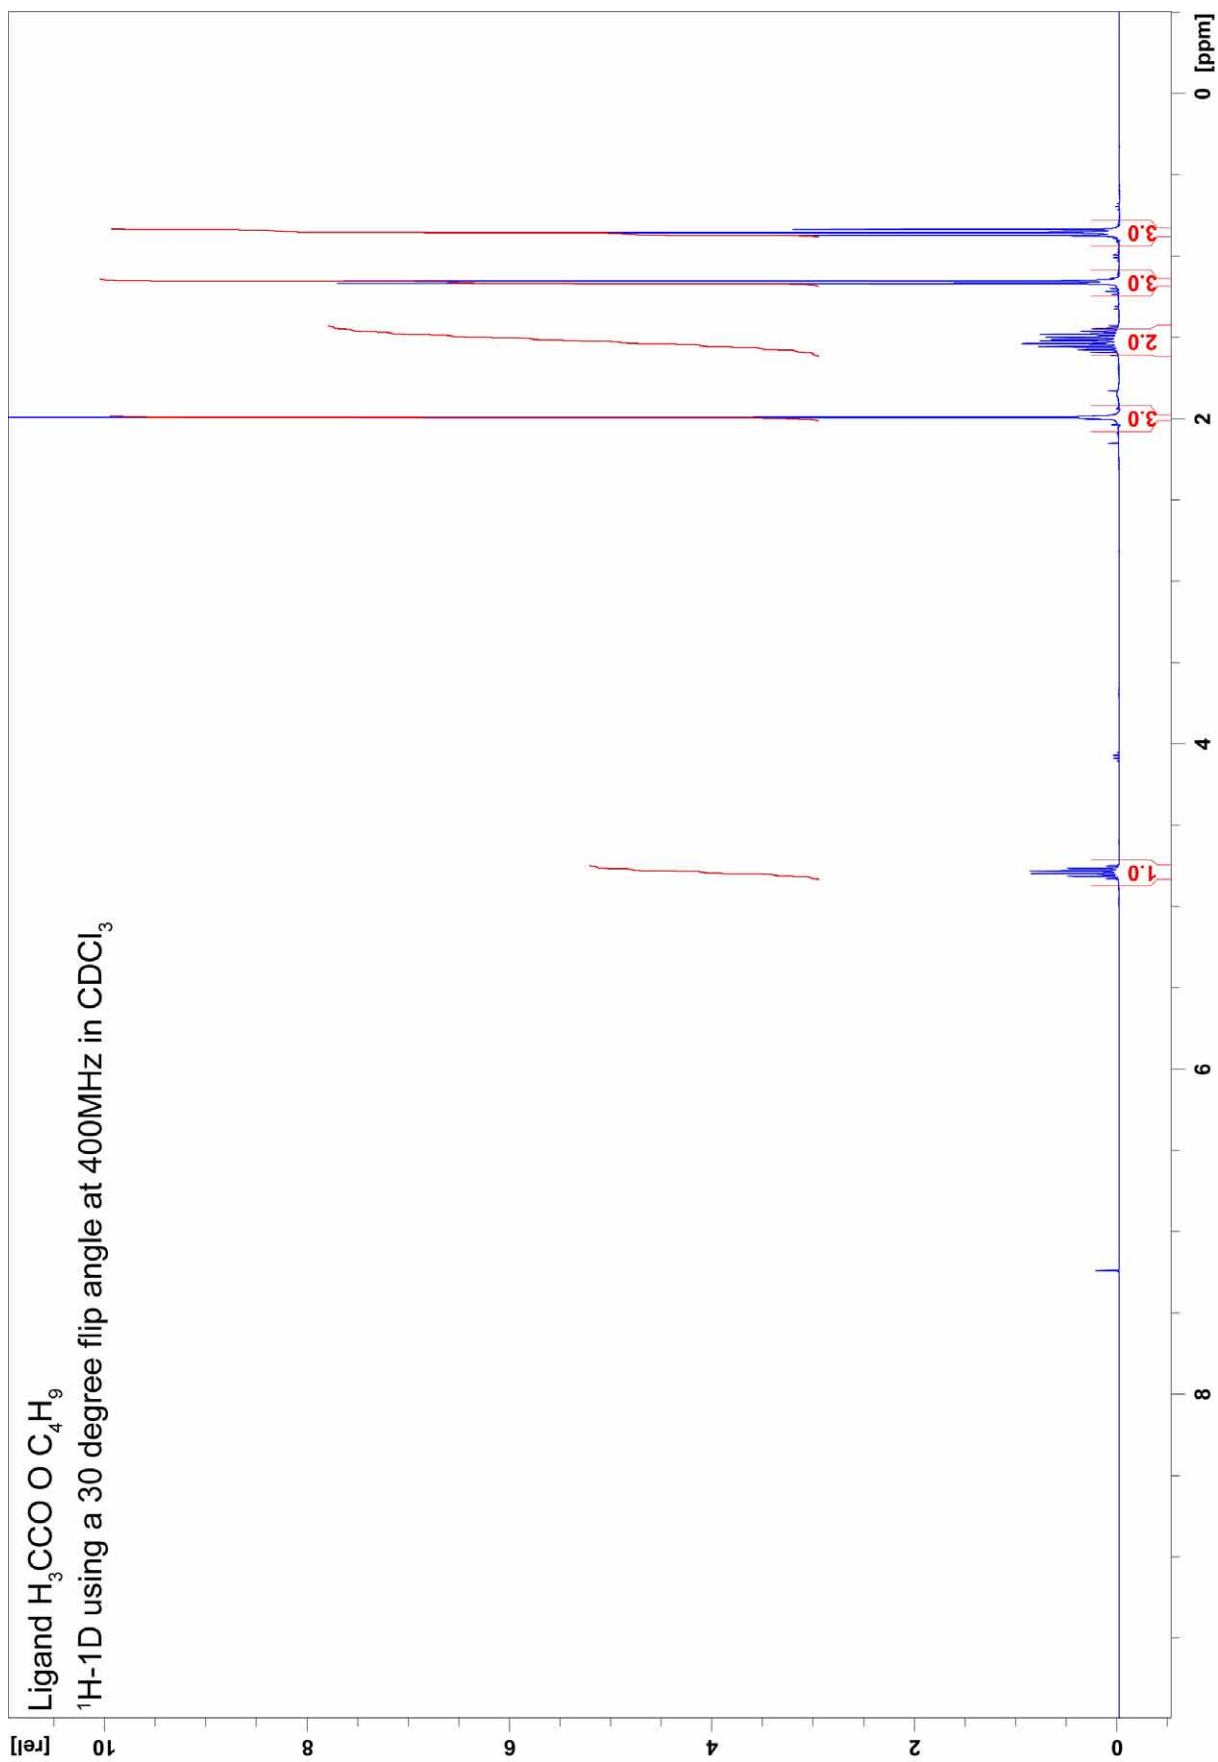

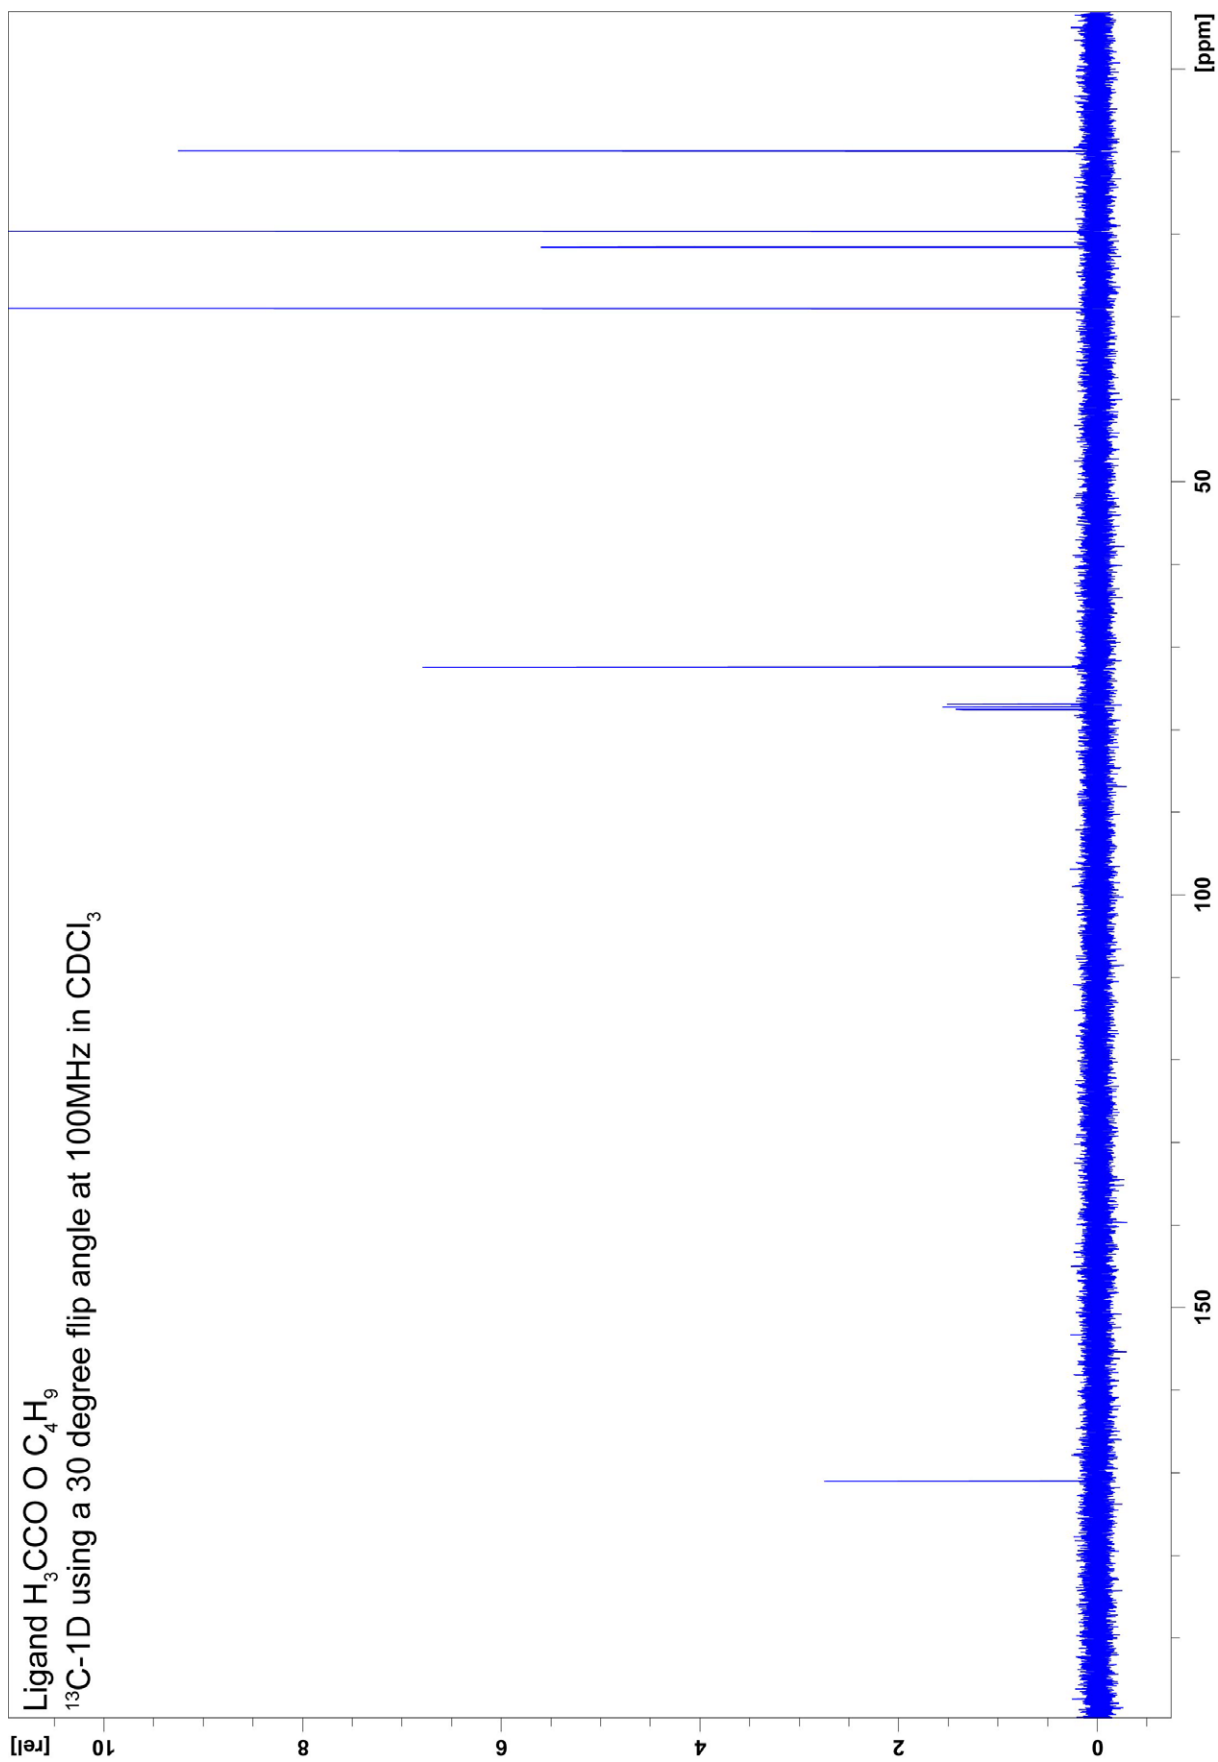

Supplement: c1ob05665d.pdf [file c1ob05665d.pdf]
